# Supplementary material for: Association between apolipoprotein C3 Sst I, T-455C, C-482T and C1100T polymorphisms and risk of coronary heart disease
Source: PubMed Central journal article supplement — BMJ Open. 2014 Jan 11;4(1):e004156. doi: 10.1136/bmjopen-2013-004156 (PMC3902403; doi:10.1136/bmjopen-2013-004156), 2014-01-11
Supplement: bmjopen-2013-004156.draft_revisions.pdf [file bmjopen-2013-004156.draft_revisions.pdf]

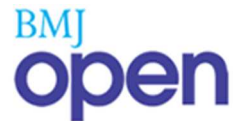

**Association between apolipoprotein C3 Sst I, T-455C, C-482T and C1100T polymorphisms and risk of coronary heart disease**

|                                 |                                                                                                                                                                                                                                                                                                                                                                                       |
|---------------------------------|---------------------------------------------------------------------------------------------------------------------------------------------------------------------------------------------------------------------------------------------------------------------------------------------------------------------------------------------------------------------------------------|
| Journal:                        | <i>BMJ Open</i>                                                                                                                                                                                                                                                                                                                                                                       |
| Manuscript ID:                  | bmjopen-2013-004156                                                                                                                                                                                                                                                                                                                                                                   |
| Article Type:                   | Research                                                                                                                                                                                                                                                                                                                                                                              |
| Date Submitted by the Author:   | 01-Oct-2013                                                                                                                                                                                                                                                                                                                                                                           |
| Complete List of Authors:       | Wu, Yihua; School of Public Health, Zhejiang University, Department of Epidemiology and Health Statistics<br>Lin, Bin; Wenzhou Central Hospital, Department of Cardiology<br>Huang, Yiwei; Wenzhou Central Hospital, Department of Cardiology<br>Zhang, Mingying; Wenzhou Central Hospital, Department of Cardiology<br>Wang, Jun; Wenzhou Central Hospital, Department of Cardiology |
| <b>Primary Subject Heading</b>: | Cardiovascular medicine                                                                                                                                                                                                                                                                                                                                                               |
| Secondary Subject Heading:      | Cardiovascular medicine, Genetics and genomics                                                                                                                                                                                                                                                                                                                                        |
| Keywords:                       | Coronary heart disease < CARDIOLOGY, GENETICS, Cardiology < INTERNAL MEDICINE                                                                                                                                                                                                                                                                                                         |
|                                 |                                                                                                                                                                                                                                                                                                                                                                                       |

SCHOLARONE™  
Manuscripts

1  
2  
3  
4 **Association between apolipoprotein C3 Sst I, T-455C, C-482T and C1100T**

5  
6 **polymorphisms and risk of coronary heart disease**

7  
8  
9 Yihua Wu<sup>2</sup> Bin Lin<sup>1\*</sup>, Yiwei Huang<sup>1</sup>, Mingying Zhang<sup>1</sup>, Jun Wang<sup>1</sup>, \*

10  
11 <sup>1</sup>Department of Cardiology, Wenzhou Central Hospital, Wenzhou, 325000 China;

12  
13 <sup>2</sup>Department of Epidemiology and Health Statistics, Zhejiang University School of  
14  
15 Public Health, Hangzhou, 310058 China;

16  
17  
18 (Running title: ApoC3 polymorphisms and CHD risk)

19  
20  
21 \*Corresponding Author:

22  
23  
24 Bin Lin, MD, Department of Cardiology, Wenzhou Central Hospital, Wenzhou,  
25  
26 325000 China;

27  
28  
29 Tel: 13706670776

30  
31 E-mail: [d4c3b2a@sina.com](mailto:d4c3b2a@sina.com)

32  
33  
34 Yihua Wu, PhD, Department of Epidemiology and Health Statistics, Zhejiang  
35  
36 University School of Public Health, Hangzhou, 310058 China;

37  
38  
39 Tel/Fax: 86-0571-88208140

40  
41  
42 E-mail: [georgewuer@126.com](mailto:georgewuer@126.com)

43  
44  
45  
46 We declare that we have no conflict of interest.  
47  
48  
49  
50  
51  
52  
53  
54  
55  
56  
57  
58  
59  
60

## Abstract

**Objectives:** Apolipoprotein C3 (ApoC3) polymorphisms have been suggested to be associated with risk of coronary heart disease (CHD). However, the results of relevant studies were inconsistent. We aimed to systematically evaluate this issue.

**Design:** Pubmed and Embase databases (up to March 2013) were systematically searched to identify studies evaluating the association between ApoC3 polymorphisms and CHD risk. Two reviewers independently identified studies, extracted and analyzed data. Either a fixed- or a random-effects model was adopted to estimate overall odds ratios (ORs).

**Studies reviewed:** Finally, twenty-one studies comprising 15591 participants were included in this systematic review.

**Results:** Under dominant model, SstI polymorphism was borderline significantly associated with CHD risk (S1S2+S2S2 vs. S1S1, pooled OR=1.19, 95% CI 1.00-1.42). Subgroup analyses suggested that SstI polymorphism was significantly associated with myocardial infarction (MI) risk (pooled OR=1.42, 95% CI 1.06-1.91), and SstI polymorphism was statistically associated with CHD risk among Asian population (pooled OR=1.35, 95% CI 1.08-1.69) and in retrospective studies (pooled OR=1.30, 95% CI 1.04-1.61). Significant association was observed between T-455C polymorphism and CHD risk (TC+CC vs. TT, pooled OR=1.22, 95% CI 1.06-1.42). C-482T and C1100T polymorphisms were not indicated to be associated with CHD risk.

**Conclusions:** ApoC3 Sst I and T-455C polymorphisms might be associated with

1  
2  
3  
4 CHD risk significantly.

5  
6 **Key Words:** coronary heart disease, apolipoprotein C-III, genetic polymorphisms,  
7  
8 risk factors, meta-analysis.  
9

### 10 11 12 **Article focus**

13  
14  
15 The aim of this study was to systematically evaluate the association between  
16  
17 apolipoprotein C3 polymorphisms and CHD risk.  
18

### 19 20 **Key message**

21  
22 This study shows that ApoC3 Sst I and T-455C polymorphisms might be associated  
23  
24 with CHD risk significantly.  
25  
26

### 27 28 **Strengths and limitations of the study**

29  
30 The present study included twenty-one studies comprising 15591 subjects and  
31  
32 comprehensively evaluated the association between ApoC3 polymorphisms and CHD  
33  
34 risk.  
35  
36

37  
38 Most of the included studies were from Asia, Europe and USA, so the conclusions  
39  
40 may not be true for other ethnic groups. Besides, between-study heterogeneity could  
41  
42 not be completely explained.  
43  
44  
45  
46  
47  
48  
49  
50  
51  
52  
53  
54  
55  
56  
57  
58  
59  
60

## Introduction

The progression of CHD is complicated and is influenced by multi genetic and environmental factors, and atherosclerosis of coronary artery is the basic pathogenic factor of CHD<sup>1</sup>. Plasma lipids and lipoproteins are important risk factors for atherosclerosis, and genes involved in lipoprotein metabolism might be candidate genes for CHD susceptibility<sup>2 3</sup>. Apolipoprotein C3 (ApoC3) is an essential component of circulating particles in TG-rich lipoprotein, and inhibits the hydrolysis of TG-rich particles by the lipoprotein lipase and their hepatic uptake mediated by Apolipoprotein E<sup>4</sup>. Therefore, high levels of ApoC3 may cause hypertriglyceridemia<sup>5</sup>. Previous studies supported that ApoC3 might play an important role in CHD development, and the ApoC3 concentration was also associated with CHD risk<sup>6 7</sup>.

Serum ApoC3 concentration was shown to be influenced by genetic and acquired factors<sup>8</sup>. Several polymorphisms have been found in ApoC3 gene, including C-482T, T-455C, Sst I, C1100T polymorphism<sup>9-12</sup>. In recent years, studies have investigated the correlation between these polymorphisms and CHD risk, while the results were inconsistent. The aim of our meta-analysis was to assess the association between ApoC3 polymorphisms and risk of CHD.

## Methods

### Literature search

Systematic literature searches were conducted before March 2013 in Pubmed and Embase databases without restrictions. Combination of the following terms were applied: “coronary heart disease” OR “coronary artery disease” OR “myocardial

1  
2  
3  
4 infarction” OR “acute coronary syndrome” OR “ischemic heart disease” OR  
5  
6 “cardiovascular disease” OR “CHD” OR “CAD” OR “MI” OR “ACS” OR “IHD”;  
7  
8 “apolipoprotein C3” OR “apolipoprotein C” OR “apolipoprotein C- III” OR  
9  
10 “apolipoprotein C III” OR “APO C3” OR “APOC3” OR “APOC” OR “APO C III”  
11  
12 OR “APO C- III”; “polymorphism” OR “variant” OR “SNP” OR “mutation”.  
13  
14  
15  
16  
17  
18  
19  
20  
21  
22  
23  
24  
25  
26  
27  
28  
29  
30  
31  
32  
33  
34  
35  
36  
37  
38  
39  
40  
41  
42  
43  
44  
45  
46  
47  
48  
49  
50  
51  
52  
53  
54  
55  
56  
57  
58  
59  
60

References of relevant articles were also scanned for studies potentially missed in the primary searches. Articles published in English were retrieved. And the retrieved studies were carefully examined to exclude potential duplicates or overlapping data. This meta-analysis was designed, conducted and reported according to PRISMA statement<sup>13</sup>.

### **Selection criteria and data extraction**

Studies retrieved from the initial search were then screened for eligible articles. Titles and abstracts were scanned and then full papers were reviewed. We included articles if they met all the following criteria: (1) evaluating the association between ApoC3 polymorphism and coronary heart disease; (2) odds ratio (OR) estimates and their 95% confidence intervals (95%CI) were available or could be calculated; (3) each polymorphism included in the meta-analysis should be reported by at least two studies.

Data were extracted independently by two reviewers (Bin Lin and Yiwei Huang). The following information was extracted from each study: first author, publication year, country, study design, sample size, gender distribution, mean age, phenotype (disease), genotype of cases and controls. Any discrepancy was resolved by a third

investigator.

### Statistical analysis

Dominant model was applied in this study as this genetic model was most widely used in the included studies. Because some studies did not apply dominant model, we re-calculated OR values under dominant model. Either a fixed-effects model or a random-effects model was applied to pool the OR estimates of each study, according to heterogeneity across studies. The extent of heterogeneity was checked using the chi-square test and  $I^2$  test;  $p \leq 0.10$  and/or  $I^2 > 50\%$  indicates significant heterogeneity. When  $p > 0.10$ , the fixed-effects model was applied and otherwise we used the random-effects model. Subgroup analysis was applied to explore heterogeneity. Funnel plots were constructed and Begg's and Egger's tests were used to assess publication bias, and  $p \leq 0.10$  was considered to be significant. All analyses were conducted using the Stata software (version 11.0; StatCorp, College Station, TX, USA).

## Results

### Study selection and characteristics

A total of 1399 articles were identified by searching Pubmed and Embase databases. Among them, 1355 articles were excluded through screening titles and abstracts. The remaining 44 articles were carefully evaluated as full texts and 23 articles were excluded. The reasons for exclusion were articles not on right topic (13 papers), insufficient data (4 papers), relevant reviews (6 papers). This meta-analysis finally included 21 articles<sup>7 9-12 14-29</sup>. The selection process was shown in Figure 1 while the

1  
2  
3 characteristics of those studies were listed in Supplementary Table 1. Among these  
4  
5 studies, fifteen studies assessed ApoC3 Sst I polymorphism, four studies evaluated  
6  
7 ApoC3 T-455C polymorphism, four studies reported ApoC3 C-482T polymorphism  
8  
9 and three investigated ApoC3 C1100T polymorphism (several studies reported more  
10  
11 than one polymorphism).  
12  
13  
14

## 15 **AOPC3 polymorphisms and risk of CHD**

### 16 **Meta-analysis of Sst I polymorphism**

17  
18  
19 A total of 15 studies with 11539 individuals assessed the association between Sst I  
20  
21 polymorphism and CHD risk. Under dominant model (S1S2+S2S2 vs. S1S1), the  
22  
23 pooled OR of all studies was 1.19 (95% CI 1.00-1.42) (Figure 2, Table 1), indicating a  
24  
25 borderline significant association between Sst I polymorphism and CHD risk. There  
26  
27 was significant heterogeneity among studies ( $I^2 = 48.9\%$ ,  $p=0.017$ ) (Figure 2, Table  
28  
29 1).  
30  
31  
32  
33  
34

35  
36 According to study characteristics, subgroup analysis was adopted, as shown in  
37  
38 Table 2. Pooled results showed that S1S2 and S2S2 genotypes might increase risk of  
39  
40 CHD in Asian population (pooled OR=1.35, 95% CI 1.08-1.69) but not in Caucasian  
41  
42 population (pooled OR=1.14, 95% CI 0.92-1.41). Study design could also influence  
43  
44 the result, Sst I polymorphism was significantly associated with CHD risk in  
45  
46 retrospective studies (pooled OR=1.30, 95% CI 1.04-1.61) but not in prospective  
47  
48 studies (pooled OR=0.98, 95% CI 0.75-1.28). Besides, Sst I polymorphism was  
49  
50 observed to be significantly associated with MI risk (pooled OR=1.42, 95% CI  
51  
52 1.06-1.91) but not CHD risk (pooled OR=1.09, 95% CI 0.87-1.35).  
53  
54  
55  
56  
57  
58  
59  
60



### Meta-analysis of T-455C polymorphism

The association between T-455C polymorphism and CHD risk was evaluated by 4 studies comprising 3378 individuals. Results indicated significant association between T-455C polymorphism and CHD risk (TC+CC vs. TT, pooled OR=1.22, 95% CI 1.06-1.42) (Figure 3, Table 1). No significant heterogeneity among studies was indicated ( $I^2 = 0\%$ ,  $p=0.580$ ) (Figure 3, Table 1).

### Meta-analysis of C-482T polymorphism

Four studies with 3070 individuals reported the association between C-482T polymorphism and CHD risk. There was no significant association between C-482T polymorphism and CHD risk (CT+TT vs. CC, pooled OR=1.06, 95% CI 0.92-1.22) (Figure 4, Table 1). No significant heterogeneity was observed ( $I^2 = 0\%$ ,  $p=0.788$ ) (Figure 4, Table 1).

### Meta-analysis of C1100T polymorphism

Three studies comprising 4662 participants evaluated the association between C1100T polymorphism and CHD risk. No significant association was found (CT+TT vs. CC, pooled OR=1.06, 95% CI 0.89-1.27) and no significant heterogeneity was observed ( $I^2 = 46.7\%$ ,  $p=0.153$ ) (Figure 5, Table 1).

### Publication bias

Begg's and Egger's tests suggested that no publication bias was found in our meta-analyses.

### Discussion

ApoC3 is a glycoprotein synthesized mainly in the liver and the intestinal, and

1  
2  
3  
4 plays an essential role in regulating the serum triglyceride levels. Besides, it can  
5  
6 strongly regulate the levels of VLDL and small dense LDL which potentially  
7  
8 improves atherosclerosis<sup>30</sup>. Clinical research found that ApoC3 levels were predictor  
9  
10 of risk for development of CHD<sup>31-33</sup>. In the present study, twenty-one studies were  
11  
12 included and four polymorphisms of ApoC3 were evaluated, including C-482T,  
13  
14 T-455C, Sst I and C1100T polymorphism. T-455C polymorphism was suggested to be  
15  
16 significantly associated with CHD risk, and 'C' allele increased CHD risk by 22  
17  
18 percent (CT+TT vs. CC, pooled OR=1.22, 95% CI 1.06-1.42). A borderline  
19  
20 significant association was observed between Sst I polymorphism and CHD risk.  
21  
22 While no evidence suggested significant association between C-482T and C1100T  
23  
24 polymorphisms and CHD risk. Subgroup analysis was applied for Sst I polymorphism,  
25  
26 and we found that Sst I polymorphism was significantly associated with MI risk.  
27  
28 Besides, Sst I polymorphism was significantly associated with CHD risk in Asian  
29  
30 population but not in Caucasian population, indicating that the effect of Sst I  
31  
32 polymorphism might be influenced by ethnicity. For retrospective studies, Sst I was  
33  
34 indicated to be significantly associated with CHD risk but this association was not  
35  
36 confirmed in prospective studies. So, the association between Sst I polymorphism and  
37  
38 CHD risk should be interpreted cautiously.  
39  
40  
41  
42  
43  
44  
45  
46  
47  
48

49 The mechanism of Sst I polymorphism in CHD susceptibility may be multiple.  
50  
51 Sst I polymorphism is located in 3' untranslated region of the ApoC3 gene, and it is  
52  
53 possible that this polymorphism is in linkage disequilibrium with other functional  
54  
55 polymorphism in the nearby region, such as T-455C polymorphism<sup>10</sup>. Sst I  
56  
57  
58  
59  
60

1  
2  
3  
4 polymorphism might alter plasma lipid concentrations. Several studies showed S2  
5  
6 carriers have higher plasma total cholesterol, TG and LDL-C levels<sup>12 34 35</sup>, though  
7  
8 other studies did not demonstrate significant difference<sup>10 19 36</sup>. Besides, it has been  
9  
10 shown that S2 allele might significantly influence dyslipidemic state and  
11  
12 atherosclerosis severity when patients changed their diet from saturated fatty acids to  
13  
14 olive oil<sup>37</sup>. So, Sst I polymorphism plays an important role in modulating lipid levels  
15  
16 response to dietary changes.  
17  
18  
19

20  
21 T-455C and C-482T polymorphisms both located in the 5' promoter region and  
22  
23 were in strong linkage disequilibrium with each other. These two polymorphisms  
24  
25 have been studied extensively because they could alter the nuclear transcript factors  
26  
27 which mediate the insulin response. Significant association between T-455C  
28  
29 polymorphism and risk of CHD was found under dominant model. For C-482T  
30  
31 polymorphism, no significant association with CHD risk was found.  
32  
33  
34  
35

36  
37 Different mechanisms could be linked to this finding. In previous works, T-455C  
38  
39 polymorphism was associated with increased TG and ApoC3 levels<sup>23 38</sup>. Also, T-455C  
40  
41 polymorphism was demonstrated to be significantly interacted with metabolic  
42  
43 syndrome<sup>38</sup>. Another study showed T-455C polymorphism could interfere with n-3  
44  
45 polyunsaturated fatty acids on ApoC3 concentrations<sup>7</sup>. They found that CC  
46  
47 homozygous carriers were poorly responsive to the ApoC3 lowering effects of n-3  
48  
49 polyunsaturated fatty acids<sup>7</sup>.  
50  
51  
52  
53

54 The present meta-analysis has several strengths. First, our study included  
55  
56 twenty-one studies comprising 15591 subjects, which was sufficient to allow adequate  
57  
58  
59  
60

1  
2  
3  
4 statistical power to calculate the results. Second, we comprehensively evaluated the  
5  
6 association between ApoC3 polymorphisms and CHD risk, and a total of four  
7  
8 polymorphisms of ApoC3 were assessed. Besides, no publication bias was observed,  
9  
10 indicating the pooled results might be unbiased.  
11  
12

13  
14 The current analysis also has several limitations. First, most of the included studies  
15  
16 investigated Asian or Caucasian population, so the conclusions may not be true for  
17  
18 other ethnic groups. Second, significant heterogeneity was found and could not be  
19  
20 completely explained when assess some polymorphisms. Finally, only articles  
21  
22 published in English were included.  
23  
24

25  
26 In summary, ApoC3 Sst I and T-455C polymorphisms might be associated with  
27  
28 CHD risk, while no evidence suggested significant association between C-482T and  
29  
30 C1100T polymorphisms and CHD risk.  
31  
32

### 33 34 **Acknowledgements:**

35  
36 The Corresponding Authors (Drs. Bin Lin and Yihua Wu) have the right to grant on  
37  
38 behalf of all authors and does grant on behalf of all authors. Drs. Bin Lin and Yihua  
39  
40 Wu contributed to conception, design of the study, and editing the manuscript; Drs.  
41  
42 Yiwei Huang and Mingying Zhang contributed to data acquisition, analysis, and  
43  
44 interpretation of the data. Dr. Jun Wang contributed to statistical analysis and editing  
45  
46 the manuscript.  
47  
48

49  
50  
51 **Data sharing statement:** No additional data are available.

52  
53  
54 We declare that we have no conflict of interest.  
55  
56  
57  
58  
59  
60

**Contributorship Statement:**

The Corresponding Authors (Drs. Bin Lin and Yihua Wu) have the right to grant on behalf of all authors and does grant on behalf of all authors. Drs. Bin Lin and Yihua Wu contributed to conception, design of the study, and editing the manuscript; Drs. Yiwei Huang and Mingying Zhang contributed to data acquisition, analysis, and interpretation of the data. Dr. Jun Wang contributed to statistical analysis and editing the manuscript.

**Funding Statement:****Competing Interest:**

No competing interest

**Reference:**

1. Ross R. Atherosclerosis--an inflammatory disease. *N Engl J Med* 1999;340:115-26.
2. Jensen MK, Rimm EB, Rader D, *et al.* S447X variant of the lipoprotein lipase gene, lipids, and risk of coronary heart disease in 3 prospective cohort studies. *Am Heart J* 2009;157:384-90.
3. Nordestgaard BG, Benn M, Schnohr P, *et al.* Nonfasting triglycerides and risk of myocardial infarction, ischemic heart disease, and death in men and women. *JAMA* 2007;298:299-308.
4. Windler E, Havel RJ. Inhibitory effects of C apolipoproteins from rats and humans on the uptake of triglyceride-rich lipoproteins and their remnants by the perfused rat liver. *J Lipid Res* 1985;26:556-65.
5. Jong MC, Hofker MH, Havekes LM. Role of ApoCs in lipoprotein metabolism: functional differences between ApoC1, ApoC2, and ApoC3. *Arterioscler Thromb Vasc Biol* 1999;19:472-84.
6. Hodis HN, Mack WJ, Azen SP, *et al.* Triglyceride- and cholesterol-rich lipoproteins have a differential effect on mild/moderate and severe lesion progression as assessed by quantitative coronary angiography in a controlled trial of lovastatin. *Circulation* 1994;90:42-9.
7. Olivieri O, Martinelli N, Sandri M, *et al.* Apolipoprotein C-III, n-3 polyunsaturated fatty acids, and "insulin-resistant" T-455C APOC3 gene polymorphism in heart disease patients: example of gene-diet interaction. *Clin Chem* 2005;51:360-7.
8. Tilly P, Sass C, Vincent-Viry M, *et al.* Biological and genetic determinants of serum apoC-III concentration: reference limits from the Stanislas Cohort. *J Lipid Res* 2003;44:430-6.
9. Yu J, Huang J, Liang Y, *et al.* Lack of association between apolipoprotein C3 gene polymorphisms and risk of coronary heart disease in a Han population in East China. *Lipids Health Dis* 2011;10:200.
10. Sediri Y, Kallel A, Feki M, *et al.* Association of a DNA polymorphism of the apolipoprotein AI-CIII-AIV gene cluster with myocardial infarction in a Tunisian population. *Eur J Intern Med* 2011;22:407-11.
11. Bhanushali AA, Das BR. Influence of genetic variants in the apolipoprotein A5 and C3 gene on lipids, lipoproteins, and its association with coronary artery disease in Indians. *J Community Genet* 2010;1:139-48.
12. Abd El-Aziz TA, Mohamed RH, Hashem RM. Association of lipoprotein lipase and apolipoprotein C-III genes polymorphism with acute myocardial infarction in diabetic patients. *Mol Cell Biochem* 2011;354:141-50.
13. Moher D, Liberati A, Tetzlaff J, *et al.* Preferred reporting items for systematic reviews and meta-analyses: the PRISMA statement. *Ann Intern Med* 2009;151:264-9, W64.
14. AshokKumar M, Subhashini NG, SaiBabu R, *et al.* Genetic variants on apolipoprotein gene cluster influence triglycerides with a risk of coronary artery disease among Indians. *Mol Biol Rep* 2010;37:521-7.
15. Muendlein A, Saely CH, Marte T, *et al.* Synergistic effects of the apolipoprotein E epsilon3/epsilon2/epsilon4, the cholesteryl ester transfer protein TaqIB, and the apolipoprotein C3 -482 C>T polymorphisms on their association with coronary artery disease. *Atherosclerosis* 2008;199:179-86.
16. Martinelli N, Trabetti E, Bassi A, *et al.* The -1131 T>C and S19W APOA5 gene polymorphisms are associated with high levels of triglycerides and apolipoprotein C-III, but not with coronary artery disease: an angiographic study. *Atherosclerosis* 2007;191:409-17.

17. Dallongeville J, Cottel D, Montaye M, *et al.* Impact of APOA5/A4/C3 genetic polymorphisms on lipid variables and cardiovascular disease risk in French men. *Int J Cardiol* 2006;106:152-6.
18. Tobin MD, Braund PS, Burton PR, *et al.* Genotypes and haplotypes predisposing to myocardial infarction: a multilocus case-control study. *Eur Heart J* 2004;25:459-67.
19. Liu S, Song Y, Hu FB, *et al.* A prospective study of the APOA1 XmnI and APOC3 SstI polymorphisms in the APOA1/C3/A4 gene cluster and risk of incident myocardial infarction in men. *Atherosclerosis* 2004;177:119-26.
20. Chhabra S, Narang R, Lakshmy R, *et al.* Apolipoprotein C3 SstI polymorphism in the risk assessment of CAD. *Mol Cell Biochem* 2004;259:59-66.
21. Wong WM, Hawe E, Li LK, *et al.* Apolipoprotein AIV gene variant S347 is associated with increased risk of coronary heart disease and lower plasma apolipoprotein AIV levels. *Circ Res* 2003;92:969-75.
22. Izar MC, Fonseca FA, Ihara SS, *et al.* Risk Factors, biochemical markers, and genetic polymorphisms in early coronary artery disease. *Arq Bras Cardiol* 2003;80:379-95.
23. Olivieri O, Stranieri C, Bassi A, *et al.* ApoC-III gene polymorphisms and risk of coronary artery disease. *J Lipid Res* 2002;43:1450-7.
24. Russo GT, Meigs JB, Cupples LA, *et al.* Association of the Sst-I polymorphism at the APOC3 gene locus with variations in lipid levels, lipoprotein subclass profiles and coronary heart disease risk: the Framingham offspring study. *Atherosclerosis* 2001;158:173-81.
25. Wick U, Witt E, Engel W. Restriction fragment length polymorphisms at the apoprotein genes AI, CIII and B-100 and in the 5' flanking region of the insulin gene as possible markers of coronary heart disease. *Clin Genet* 1995;47:184-90.
26. Vavatsi NA, Kouidou SA, Geleris PN, *et al.* Increased frequency of the rare PstI allele (P2) in a population of CAD patients in northern Greece. *Clin Genet* 1995;47:22-6.
27. Rigoli L, Raimondo G, Di Benedetto A, *et al.* Apolipoprotein AI-CIII-AIV genetic polymorphisms and coronary heart disease in type 2 diabetes mellitus. *Acta Diabetol* 1995;32:251-6.
28. Miettinen HE, Korpela K, Hamalainen L, *et al.* Polymorphisms of the apolipoprotein and angiotensin converting enzyme genes in young North Karelian patients with coronary heart disease. *Hum Genet* 1994;94:189-92.
29. Kee F, Amouyel P, Fumeron F, *et al.* Lack of association between genetic variations of apo A-I-C-III-A-IV gene cluster and myocardial infarction in a sample of European male: ECTIM study. *Atherosclerosis* 1999;145:187-95.
30. Sacks FM, Zheng C, Cohn JS. Complexities of plasma apolipoprotein C-III metabolism. *J Lipid Res* 2011;52:1067-70.
31. Onat A, Erginel-Unaltuna N, Coban N, *et al.* APOC3 -482C>T polymorphism, circulating apolipoprotein C-III and smoking: interrelation and roles in predicting type-2 diabetes and coronary disease. *Clin Biochem* 2011;44:391-6.
32. Olivieri O, Martinelli N, Girelli D, *et al.* Apolipoprotein C-III predicts cardiovascular mortality in severe coronary artery disease and is associated with an enhanced plasma thrombin generation. *J Thromb Haemost* 2010;8:463-71.
33. Sacks FM, Alaupovic P, Moye LA, *et al.* VLDL, apolipoproteins B, CIII, and E, and risk of recurrent coronary events in the Cholesterol and Recurrent Events (CARE) trial. *Circulation* 2000;102:1886-92.

- 1  
2  
3 34. Arai H, Yamamoto A, Matsuzawa Y, *et al.* Polymorphisms in four genes related to triglyceride  
4 and HDL-cholesterol levels in the general Japanese population in 2000. *J Atheroscler*  
5 *Thromb* 2005;12:240-50.  
6  
7 35. Buzza M, Fripp Y, Mitchell RJ. Apolipoprotein AI and CIII gene polymorphisms and their  
8 association with lipid levels in Italian, Greek and Anglo-Irish populations of Australia. *Ann*  
9 *Hum Biol* 2001;28:481-90.  
10  
11 36. Corella D, Guillen M, Saiz C, *et al.* Associations of LPL and APOC3 gene polymorphisms on  
12 plasma lipids in a Mediterranean population: interaction with tobacco smoking and the  
13 APOE locus. *J Lipid Res* 2002;43:416-27.  
14  
15 37. Perez-Martinez P, Gomez P, Paz E, *et al.* Interaction between smoking and the SstI polymorphism  
16 of the apo C-III gene determines plasma lipid response to diet. *Nutr Metab Cardiovasc Dis*  
17 2001;11:237-43.  
18  
19 38. Olivieri O, Bassi A, Stranieri C, *et al.* Apolipoprotein C-III, metabolic syndrome, and risk of  
20 coronary artery disease. *J Lipid Res* 2003;44:2374-81.  
21  
22  
23  
24  
25  
26  
27  
28  
29  
30  
31  
32  
33  
34  
35  
36  
37  
38  
39  
40  
41  
42  
43  
44  
45  
46  
47  
48  
49  
50  
51  
52  
53  
54  
55  
56  
57  
58  
59  
60



**Table 1 Meta-analysis results of Sst I, T-455C, C-482T, C1100T polymorphisms**

| Polymorphism | No. of studies | No. of participants | Comparison         | OR (95% CI)      | Heterogeneity      |       |
|--------------|----------------|---------------------|--------------------|------------------|--------------------|-------|
|              |                |                     |                    |                  | I <sup>2</sup> (%) | P     |
| Sst I        | 15             | 11539               | S1S2+S2S2 vs. S1S1 | 1.19 (1.00-1.42) | 48.9               | 0.017 |
| T-455C       | 4              | 3378                | TC+CC vs. TT       | 1.22 (1.06-1.42) | 0                  | 0.580 |
| C-482T       | 4              | 3070                | CT+TT vs. CC       | 1.06 (0.92-1.22) | 0                  | 0.788 |
| C1100T       | 3              | 4662                | CT+TT vs. CC       | 1.06 (0.89-1.27) | 46.7               | 0.153 |

**Table 2 Subgroup analysis of Sst I polymorphism**

| Groups       | OR (95% CI)   | Heterogeneity      |      |       |
|--------------|---------------|--------------------|------|-------|
|              |               | I <sup>2</sup> (%) | P    |       |
| Ethnicity    | Caucasian     | 1.14 (0.92-1.41)   | 54.2 | 0.013 |
|              | Asian         | 1.35 (1.08-1.69)   | 0    | 0.427 |
| Study design | Retrospective | 1.30 (1.04-1.61)   | 39.0 | 0.098 |
|              | Prospective   | 0.98 (0.75-1.28)   | 52.3 | 0.098 |
| Phenotype    | CHD           | 1.09 (0.87-1.35)   | 46.0 | 0.047 |
|              | MI            | 1.42 (1.06-1.91)   | 52.3 | 0.099 |

**Figure legends**

**Figure 1.** Flow diagram of study selection process.

**Figure 2.** Association between Sst I polymorphism and CHD risk.

1  
2  
3  
4  
5  
6  
7  
8  
9  
10  
11  
12  
13  
14  
15  
16  
17  
18  
19  
20  
21  
22  
23  
24  
25  
26  
27  
28  
29  
30  
31  
32  
33  
34  
35  
36  
37  
38  
39  
40  
41  
42  
43  
44  
45  
46  
47  
48  
49

**Figure 3.** Association between T-455C polymorphism and CHD risk.

**Figure 4.** Association between C-482T polymorphism and CHD risk.

**Figure 5.** Association between C1100T polymorphism and CHD risk.

**Supplementary file.**

**Supplementary Table 1** Characteristics of the included studies

**Checklist** PRISMA checklist

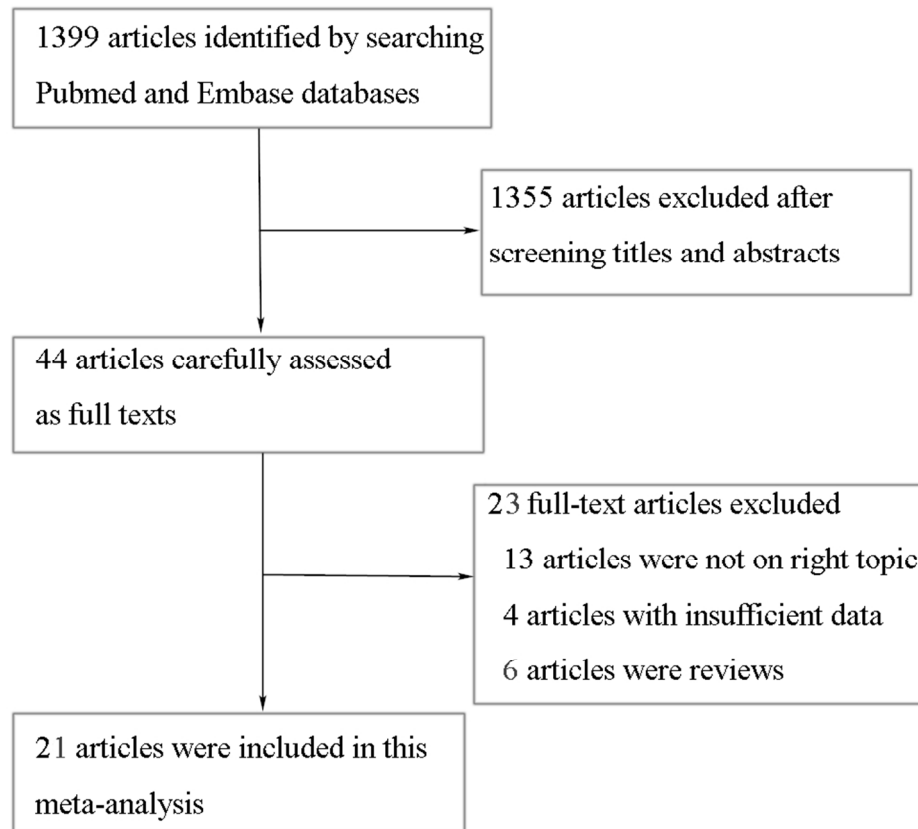

Figure 1. Flow diagram of study selection process.  
88x88mm (300 x 300 DPI)

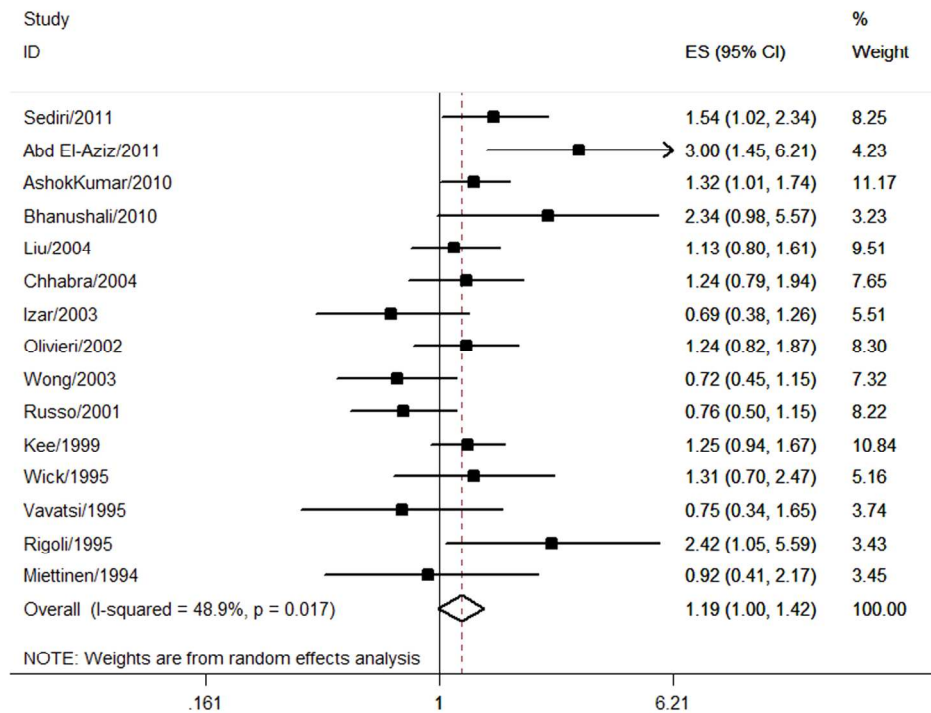

Figure 2. Association between Sst I polymorphism and CHD risk.  
127x102mm (300 x 300 DPI)

1  
2  
3  
4  
5  
6  
7  
8  
9  
10  
11  
12  
13  
14  
15  
16  
17  
18  
19  
20  
21  
22  
23  
24  
25  
26  
27  
28  
29  
30  
31  
32  
33  
34  
35  
36  
37  
38  
39  
40  
41  
42  
43  
44  
45  
46  
47  
48  
49  
50  
51  
52  
53  
54  
55  
56  
57  
58  
59  
60

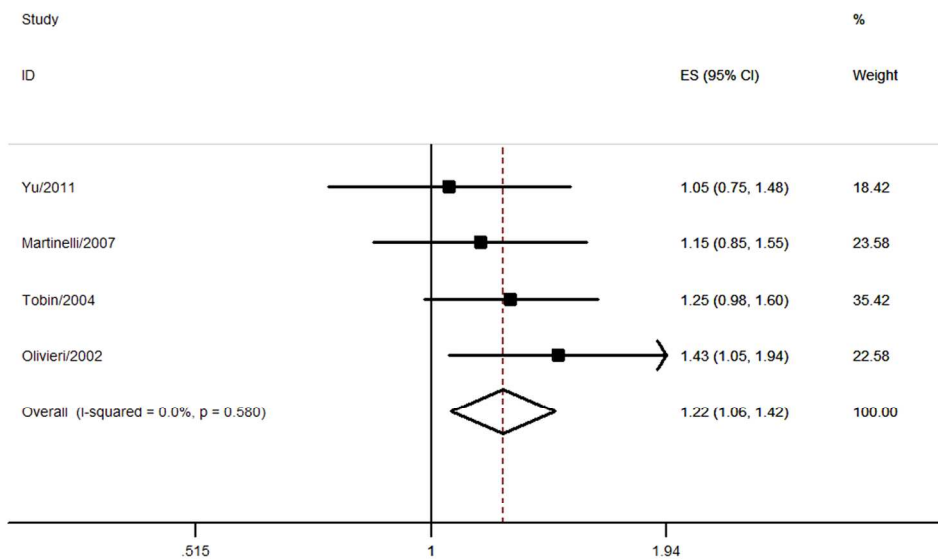

Figure 3. Association between T-455C polymorphism and CHD risk.  
127x84mm (300 x 300 DPI)

Review only

1  
2  
3  
4  
5  
6  
7  
8  
9  
10  
11  
12  
13  
14  
15  
16  
17  
18  
19  
20  
21  
22  
23  
24  
25  
26  
27  
28  
29  
30  
31  
32  
33  
34  
35  
36  
37  
38  
39  
40  
41  
42  
43  
44  
45  
46  
47  
48  
49  
50  
51  
52  
53  
54  
55  
56  
57  
58  
59  
60

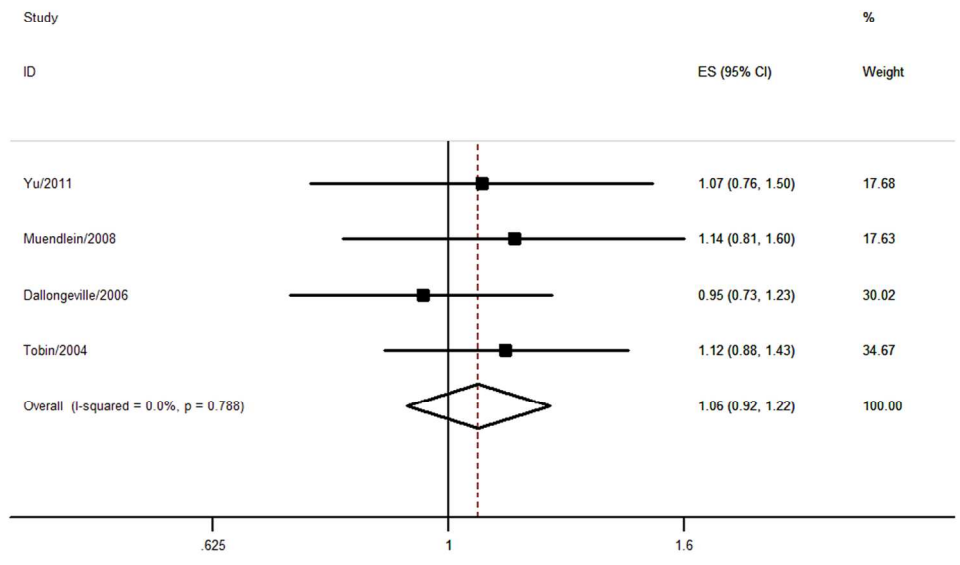

Figure 4. Association between C-482T polymorphism and CHD risk.  
127x84mm (300 x 300 DPI)

Review only

1  
2  
3  
4  
5  
6  
7  
8  
9  
10  
11  
12  
13  
14  
15  
16  
17  
18  
19  
20  
21  
22  
23  
24  
25  
26  
27  
28  
29  
30  
31  
32  
33  
34  
35  
36  
37  
38  
39  
40  
41  
42  
43  
44  
45  
46  
47  
48  
49  
50  
51  
52  
53  
54  
55  
56  
57  
58  
59  
60

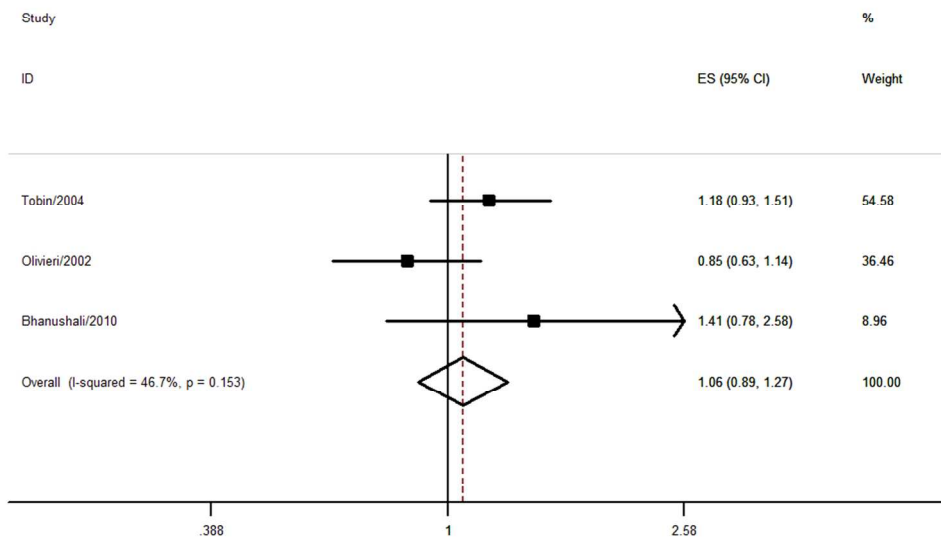

Figure 5. Association between C1100T polymorphism and CHD risk.  
127x82mm (300 x 300 DPI)

Review only

1  
2  
3  
4  
5  
6  
7  
8  
9  
10  
11  
12  
13  
14  
15  
16  
17  
18  
19  
20  
21  
22  
23  
24  
25  
26  
27  
28  
29  
30  
31  
32  
33  
34  
35  
36  
37  
38  
39  
40  
41  
42  
43  
44  
45  
46  
47  
48  
49

**Supplementary Table 1 Characteristics of the included studies**

| Study and Publication year     | Country | Study design | Sample size (cases/controls) | Sex (M/F)         | Mean Age (years) | Pheno type | Mutation or polymorphisms | Cases |     |    | Controls |    |    | HWE |
|--------------------------------|---------|--------------|------------------------------|-------------------|------------------|------------|---------------------------|-------|-----|----|----------|----|----|-----|
|                                |         |              |                              |                   |                  |            |                           | aa    | ab* | bb | aa       | ab | bb |     |
| Yu/2011 <sup>9</sup>           | China   | Case-control | 611(286/325)                 | Cases: 214/72     | Cases: 56.3      | CHD        | T-455C                    | 90    | 13  | 47 | 11       | 15 | 54 | Yes |
|                                |         |              |                              | Controls: 172/153 | Controls: 55.79  |            |                           | 1     |     | 2  | 7        |    |    |     |
| Sediri/2011 <sup>10</sup>      | Tunisia | Case-control | 687(326/361)                 | Cases: 326/0      | Cases: 53.8      | MI         | Sst I                     | 26    | 53  | 7  | 31       | 45 | 1  | Yes |
|                                |         |              |                              | Controls: 361/0   | Controls: 51.1   |            |                           | 6     |     | 5  |          |    |    |     |
| Abd El-Aziz/2011 <sup>12</sup> | Egypt   | Case-control | 300(200/100)                 | Cases: 67/33      | Cases: 52.9      | AMI        | Sst I                     | 15    | 42  | 8  | 70       | 10 | 20 | Yes |
|                                |         |              |                              | Controls: 32/18   | Controls: 50.7   |            |                           | 0     |     |    |          |    |    |     |
| AshokKumar/2010 <sup>14</sup>  | India   | Case-control | 832(416/416)                 | Cases: 322/94     | Cases: 53.23     | CHD        | Sst I                     | 18    | 19  | 34 | 21       | 17 | 22 | Yes |
|                                |         |              |                              | Controls: 315/101 | Controls: 53.59  |            |                           | 9     | 3   |    | 8        | 6  |    |     |
| Bhanushali/                    | India   | Case-control | 240(50/1                     | Cases:            | Cases:           | CHD        | Sst I and                 | -     | -   | -  | -        | -  | -  | -   |



1  
2  
3  
4  
5  
6  
7  
8  
9  
10  
11  
12  
13  
14  
15  
16  
17  
18  
19  
20  
21  
22  
23  
24  
25  
26  
27  
28  
29  
30  
31  
32  
33  
34  
35  
36  
37  
38  
39  
40  
41  
42  
43  
44  
45  
46  
47  
48  
49

|                                  |         |               |               |                   |                 |            |        |    |    |    |    |    |    |     |  |
|----------------------------------|---------|---------------|---------------|-------------------|-----------------|------------|--------|----|----|----|----|----|----|-----|--|
| 2010 <sup>11</sup>               |         | ol            | 90)           | 82/8              | 47              |            | C1100T |    |    |    |    |    |    |     |  |
|                                  |         |               |               | Controls:         | Controls:       |            |        |    |    |    |    |    |    |     |  |
|                                  |         |               |               | 146/44            | 48              |            |        |    |    |    |    |    |    |     |  |
| Muendlein/2008 <sup>15</sup>     | Austria | Cross-section | 557(332/225)  | Cases: 264/68     | Cases: 62.5     | CHD        | C-482T | 16 | 14 | 27 | 11 | 87 | 21 | Yes |  |
|                                  |         |               |               | Controls: 123/102 | Controls: 61.5  |            |        | 2  | 3  |    | 7  |    |    |     |  |
| Martinelli/2007 <sup>16</sup>    | Italy   | Case-control  | 913(669/244)  | Cases: 544/125    | Cases: 60.7     | CHD        | T-455C | 24 | 30 | 12 | 97 | 11 | 29 | Yes |  |
|                                  |         |               |               | Controls: 168/76  | Controls: 58.7  |            |        | 4  | 0  | 5  |    | 8  |    |     |  |
| Dallongeville/2006 <sup>17</sup> | France  | Case-control  | 917(442/475)  | Cases: 442/0      | Cases: 35-64    | CHD and MI | C-482T | 23 | 15 | 35 | 25 | 18 | 31 | Yes |  |
|                                  |         |               |               | Controls: 475/0   | Controls: 35-64 |            |        | 7  | 5  |    | 5  | 5  |    |     |  |
| Olivieri/2005 <sup>7</sup>       | Italy   | Cross-section | 848(590/258)  | Cases: 486/104    | Cases: 60.5     | CHD        | T-455C | 21 | 27 | 10 | 11 | 11 | 24 | Yes |  |
|                                  |         |               |               | Controls: 165/93  | Controls: 58.3  |            |        | 2  | 1  | 7  | 6  | 8  |    |     |  |
| Tobin/2004 <sup>18</sup>         | UK      | Case-control  | 1054(549/505) | Cases: 372/177    | Cases: 61.9     | MI         | C-482T | 29 | 23 | 23 | 28 | 19 | 29 | Yes |  |
|                                  |         |               |               | Controls: 313/192 | Controls: 58.6  |            |        | 1  | 3  |    | 3  | 3  |    |     |  |
|                                  |         |               |               |                   |                 |            | T-455C | 21 | 28 | 52 | 21 | 22 | 62 | Yes |  |
|                                  |         |               |               |                   |                 |            |        | 1  | 4  |    | 4  | 9  |    |     |  |
|                                  |         |               |               |                   |                 |            | C1100T | 29 | 20 | 40 | 29 | 17 | 37 | Yes |  |

1  
2  
3  
4  
5  
6  
7  
8  
9  
10  
11  
12  
13  
14  
15  
16  
17  
18  
19  
20  
21  
22  
23  
24  
25  
26  
27  
28  
29  
30  
31  
32  
33  
34  
35  
36  
37  
38  
39  
40  
41  
42  
43  
44  
45  
46  
47  
48  
49

|                             |        |                     |                |                                    |                                 |     |                                   |         |         |         |         |         |    |     |
|-----------------------------|--------|---------------------|----------------|------------------------------------|---------------------------------|-----|-----------------------------------|---------|---------|---------|---------|---------|----|-----|
|                             |        |                     |                |                                    |                                 |     |                                   | 8       | 9       |         | 6       | 2       |    |     |
| Liu/2004 <sup>19</sup>      | USA    | Nested case-control | 758(385/373)   | Cases: 385/0<br>Controls: 373/0    | Cases: 60<br>Controls: 59       | MI  | Sst I                             | 29<br>5 | 77      | 6       | 29<br>7 | 60      | 4  | Yes |
| Chhabra/2004 <sup>20</sup>  | India  | Case-control        | 309(158/151)   | Cases: 139/19<br>Controls: 139/12  | Cases: 53.25<br>Controls: 52.45 | CHD | Sst I                             | 66      | 76      | 16      | 71      | 66      | 14 | Yes |
| Wong/2003 <sup>21</sup>     | UK     | Cohort              | 2808(187/2621) | Cases: 187/0<br>Controls: 2621/0   | Cases: 56.67<br>Controls: 56.01 | CHD | C1100T<br>C-428T<br>and Sst I     | -       | -       | -       | -       | -       | -  | -   |
| Izar/2003 <sup>22</sup>     | Brazil | Case-control        | 224(112/112)   | Cases: 65/47<br>Controls: 66/46    | Cases: 46<br>Controls: 45       | CHD | Sst I                             | 81      | 23      | 3       | 71      | 32      | 1  | Yes |
| Olivieri/2002 <sup>23</sup> | Italy  | Cross-section       | 800(549/251)   | Cases: 449/100<br>Controls: 168/83 | Cases: 60.4<br>Controls: 57.6   | CHD | T-455C<br><br>C1100T<br><br>Sst I | 19<br>4 | 25<br>3 | 10<br>2 | 11<br>0 | 11<br>8 | 23 | Yes |
|                             |        |                     |                |                                    |                                 |     |                                   | 29      | 20      | 46      | 12      | 10      | 17 | Yes |
|                             |        |                     |                |                                    |                                 |     |                                   | 8       | 5       |         | 6       | 8       |    |     |
|                             |        |                     |                |                                    |                                 |     |                                   | 45      | 97      | 0       | 21      | 37      | 0  | Yes |
|                             |        |                     |                |                                    |                                 |     |                                   | 2       |         |         | 4       |         |    |     |
| Russo/2001 <sup>24</sup>    | USA    | Cohort              | 2485(202)      | Cases: -                           | -                               | CHD | Sst I                             | -       | -       | -       | -       | -       | -  | -   |

|                              |         |               |               |                 |                |     |       |    |    |   |    |    |   |     |  |
|------------------------------|---------|---------------|---------------|-----------------|----------------|-----|-------|----|----|---|----|----|---|-----|--|
| 4                            |         |               | /2283)        | 146/56          |                |     |       |    |    |   |    |    |   |     |  |
|                              |         |               |               | Controls:       |                |     |       |    |    |   |    |    |   |     |  |
|                              |         |               |               | 1133/1150       |                |     |       |    |    |   |    |    |   |     |  |
| Kee/1999 <sup>29</sup>       | UK      | Cohort        | 1375(761/614) | Cases: 761/0    | -              | MI  | Sst I | 50 | 11 | 1 | 64 | 11 | 3 | Yes |  |
|                              |         |               |               | Controls: 614/0 |                |     |       | 1  | 2  |   | 5  | 3  |   |     |  |
| Wick/1995 <sup>25</sup>      | Germany | Case-contr ol | 313(212/101)  | -               | -              | CHD | Sst I | 17 | 42 | 0 | 85 | 16 | 0 | Yes |  |
|                              |         |               |               |                 |                |     |       | 0  |    |   |    |    |   |     |  |
| Vavatsi/1995 <sup>26</sup>   | Greece  | Case-contr ol | 149(95/54)    | Cases: 85/10    | Cases: 51      | CHD | Sst I | 69 | 20 | 0 | 36 | 12 | 2 | Yes |  |
|                              |         |               |               | Controls: 46/9  | Controls: 50   |     |       |    |    |   |    |    |   |     |  |
| Rigoli/1995 <sup>27</sup>    | Italy   | Case-contr ol | 124(62/62)    | Cases: 43/19    | Cases: 58.2    | CHD | Sst I | 41 | 21 | 0 | 52 | 10 | 0 | Yes |  |
|                              |         |               |               | Controls: 42/20 | Controls: 57.6 |     |       |    |    |   |    |    |   |     |  |
| Miettinen/1994 <sup>28</sup> | Finland | Case-contr ol | 132(82/50)    | Cases: 78/4     | Cases: 40.8    | CHD | Sst I | 62 | 19 | 1 | 37 | 12 | 1 | Yes |  |
|                              |         |               |               | Controls: 42/8  | Controls: 38.7 |     |       |    |    |   |    |    |   |     |  |

MI: myocardial infarction; AMI: acute myocardial infarction; CHD: coronary heart disease.  
 -: not reported.

## Checklist PRISMA checklist

| Section/topic             | # | Checklist item                                                                                                                                                                                                                                                                                              | Reported on page # |
|---------------------------|---|-------------------------------------------------------------------------------------------------------------------------------------------------------------------------------------------------------------------------------------------------------------------------------------------------------------|--------------------|
| <b>TITLE</b>              |   |                                                                                                                                                                                                                                                                                                             |                    |
| Title                     | 1 | Identify the report as a systematic review, meta-analysis, or both.                                                                                                                                                                                                                                         | 1                  |
| <b>ABSTRACT</b>           |   |                                                                                                                                                                                                                                                                                                             |                    |
| Structured summary        | 2 | Provide a structured summary including, as applicable: background; objectives; data sources; study eligibility criteria, participants, and interventions; study appraisal and synthesis methods; results; limitations; conclusions and implications of key findings; systematic review registration number. | 2-3                |
| <b>INTRODUCTION</b>       |   |                                                                                                                                                                                                                                                                                                             |                    |
| Rationale                 | 3 | Describe the rationale for the review in the context of what is already known.                                                                                                                                                                                                                              | 4                  |
| Objectives                | 4 | Provide an explicit statement of questions being addressed with reference to participants, interventions, comparisons, outcomes, and study design (PICOS).                                                                                                                                                  | 4                  |
| <b>METHODS</b>            |   |                                                                                                                                                                                                                                                                                                             |                    |
| Protocol and registration | 5 | Indicate if a review protocol exists, if and where it can be accessed (e.g., Web address), and, if available, provide registration information including registration number.                                                                                                                               |                    |
| Eligibility criteria      | 6 | Specify study characteristics (e.g., PICOS, length of follow-up) and report characteristics (e.g., years considered, language, publication status) used as criteria for eligibility, giving rationale.                                                                                                      | 5                  |
| Information sources       | 7 | Describe all information sources (e.g., databases with dates of coverage, contact with study authors to identify additional studies) in the search and date last searched.                                                                                                                                  | 4                  |

|                                    |    |                                                                                                                                                                                                                        |     |
|------------------------------------|----|------------------------------------------------------------------------------------------------------------------------------------------------------------------------------------------------------------------------|-----|
| Search                             | 8  | Present full electronic search strategy for at least one database, including any limits used, such that it could be repeated.                                                                                          | 4-5 |
| Study selection                    | 9  | State the process for selecting studies (i.e., screening, eligibility, included in systematic review, and, if applicable, included in the meta-analysis).                                                              | 5   |
| Data collection process            | 10 | Describe method of data extraction from reports (e.g., piloted forms, independently, in duplicate) and any processes for obtaining and confirming data from investigators.                                             | 5   |
| Data items                         | 11 | List and define all variables for which data were sought (e.g., PICOS, funding sources) and any assumptions and simplifications made.                                                                                  | 5   |
| Risk of bias in individual studies | 12 | Describe methods used for assessing risk of bias of individual studies (including specification of whether this was done at the study or outcome level), and how this information is to be used in any data synthesis. | 5-6 |
| Summary measures                   | 13 | State the principal summary measures (e.g., risk ratio, difference in means).                                                                                                                                          | 6   |
| Synthesis of results               | 14 | Describe the methods of handling data and combining results of studies, if done, including measures of consistency (e.g., $I^2$ ) for each meta-analysis.                                                              | 6   |

Page 1 of 2

| Section/topic               | #  | Checklist item                                                                                                                                   | Reported on page # |
|-----------------------------|----|--------------------------------------------------------------------------------------------------------------------------------------------------|--------------------|
| Risk of bias across studies | 15 | Specify any assessment of risk of bias that may affect the cumulative evidence (e.g., publication bias, selective reporting within studies).     | 6                  |
| Additional analyses         | 16 | Describe methods of additional analyses (e.g., sensitivity or subgroup analyses, meta-regression), if done, indicating which were pre-specified. | 6                  |
| <b>RESULTS</b>              |    |                                                                                                                                                  |                    |

|                               |    |                                                                                                                                                                                                          |     |
|-------------------------------|----|----------------------------------------------------------------------------------------------------------------------------------------------------------------------------------------------------------|-----|
| Study selection               | 17 | Give numbers of studies screened, assessed for eligibility, and included in the review, with reasons for exclusions at each stage, ideally with a flow diagram.                                          | 6   |
| Study characteristics         | 18 | For each study, present characteristics for which data were extracted (e.g., study size, PICOS, follow-up period) and provide the citations.                                                             | 6-7 |
| Risk of bias within studies   | 19 | Present data on risk of bias of each study and, if available, any outcome level assessment (see item 12).                                                                                                | 7-8 |
| Results of individual studies | 20 | For all outcomes considered (benefits or harms), present, for each study: (a) simple summary data for each intervention group (b) effect estimates and confidence intervals, ideally with a forest plot. | 7-8 |
| Synthesis of results          | 21 | Present results of each meta-analysis done, including confidence intervals and measures of consistency.                                                                                                  | 7-8 |
| Risk of bias across studies   | 22 | Present results of any assessment of risk of bias across studies (see Item 15).                                                                                                                          | 7-8 |
| Additional analysis           | 23 | Give results of additional analyses, if done (e.g., sensitivity or subgroup analyses, meta-regression [see Item 16]).                                                                                    | 7-8 |
| <b>DISCUSSION</b>             |    |                                                                                                                                                                                                          |     |
| Summary of evidence           | 24 | Summarize the main findings including the strength of evidence for each main outcome; consider their relevance to key groups (e.g., healthcare providers, users, and policy makers).                     | 8   |
| Limitations                   | 25 | Discuss limitations at study and outcome level (e.g., risk of bias), and at review-level (e.g., incomplete retrieval of identified research, reporting bias).                                            | 11  |
| Conclusions                   | 26 | Provide a general interpretation of the results in the context of other evidence, and implications for future research.                                                                                  | 11  |
| <b>FUNDING</b>                |    |                                                                                                                                                                                                          |     |
| Funding                       | 27 | Describe sources of funding for the systematic review and other support (e.g., supply of data); role of funders for the systematic review.                                                               |     |

From: Moher D, Liberati A, Tetzlaff J, Altman DG, The PRISMA Group (2009). Preferred Reporting Items for Systematic Reviews and Meta-Analyses: The PRISMA Statement. PLoS Med 6(6): e1000097. doi:10.1371/journal.pmed1000097



**Association between apolipoprotein C3 Sst I, T-455C, C-482T and C1100T polymorphisms and risk of coronary heart disease**

|                                 |                                                                                                                                                                                                                                                                                                                                                                                       |
|---------------------------------|---------------------------------------------------------------------------------------------------------------------------------------------------------------------------------------------------------------------------------------------------------------------------------------------------------------------------------------------------------------------------------------|
| Journal:                        | <i>BMJ Open</i>                                                                                                                                                                                                                                                                                                                                                                       |
| Manuscript ID:                  | bmjopen-2013-004156.R1                                                                                                                                                                                                                                                                                                                                                                |
| Article Type:                   | Research                                                                                                                                                                                                                                                                                                                                                                              |
| Date Submitted by the Author:   | 07-Dec-2013                                                                                                                                                                                                                                                                                                                                                                           |
| Complete List of Authors:       | Lin, Bin; Wenzhou Central Hospital, Department of Cardiology<br>Huang, Yiwei; Wenzhou Central Hospital, Department of Cardiology<br>Zhang, Mingying; Wenzhou Central Hospital, Department of Cardiology<br>Wang, Jun; Wenzhou Central Hospital, Department of Cardiology<br>Wu, Yihua; School of Public Health, Zhejiang University, Department of Epidemiology and Health Statistics |
| <b>Primary Subject Heading</b>: | Cardiovascular medicine                                                                                                                                                                                                                                                                                                                                                               |
| Secondary Subject Heading:      | Cardiovascular medicine, Genetics and genomics                                                                                                                                                                                                                                                                                                                                        |
| Keywords:                       | Coronary heart disease < CARDIOLOGY, GENETICS, Cardiology < INTERNAL MEDICINE                                                                                                                                                                                                                                                                                                         |
|                                 |                                                                                                                                                                                                                                                                                                                                                                                       |

SCHOLARONE™  
Manuscripts

1  
2  
3  
4 **Association between apolipoprotein C3 Sst I, T-455C, C-482T and C1100T**

5  
6 **polymorphisms and risk of coronary heart disease**

7  
8 Bin Lin<sup>1\*</sup>, Yiwei Huang<sup>1</sup>, Mingying Zhang<sup>1</sup>, Jun Wang<sup>1</sup>, Yihua Wu<sup>2\*</sup>

9  
10  
11 <sup>1</sup>Department of Cardiology, Wenzhou Central Hospital, Wenzhou, 325000 China;

12  
13 <sup>2</sup>Department of Epidemiology and Health Statistics, Zhejiang University School of  
14  
15 Public Health, Hangzhou, 310058 China;

16  
17  
18 (Running title: ApoC3 polymorphisms and CHD risk)

19  
20  
21 \*Corresponding Authors:

22  
23  
24 Bin Lin, MD, Department of Cardiology, Wenzhou Central Hospital, Wenzhou,  
25  
26 325000 China;

27  
28  
29 Tel: 13706670776

30  
31 E-mail: [d4c3b2a@sina.com](mailto:d4c3b2a@sina.com)

32  
33  
34 Yihua Wu, PhD, Department of Epidemiology and Health Statistics, Zhejiang  
35  
36 University School of Public Health, Hangzhou, 310058 China;

37  
38  
39 Tel/Fax: 86-0571-88208140

40  
41  
42 E-mail: [georgewuer@126.com](mailto:georgewuer@126.com)

43  
44  
45  
46 We declare that we have no conflict of interest.  
47  
48  
49  
50  
51  
52  
53

54 **Key Words:** coronary heart disease, apolipoprotein C-III, genetic polymorphisms,  
55  
56 risk factors, meta-analysis  
57  
58  
59  
60



## Abstract

**Objectives:** Apolipoprotein C3 (ApoC3) polymorphisms have been suggested to be associated with risk of coronary heart disease (CHD). However, the results of relevant studies were inconsistent. We aimed to systematically evaluate this issue.

**Design:** Pubmed, Embase and Cochrane library databases (up to March 2013) were systematically searched to identify studies evaluating the association between ApoC3 polymorphisms and CHD risk. Two reviewers independently identified studies, extracted and analyzed data. Either a fixed- or a random-effects model was adopted to estimate overall odds ratios (ORs).

**Studies reviewed:** Finally, twenty studies comprising 15591 participants were included in this systematic review. Fifteen studies with 11539 individuals were included in the meta-analysis of Sst I polymorphism, four studies comprising 3378 individuals assessed T-455C polymorphism, four studies with 3070 participants evaluated C-482T polymorphism and C1100T polymorphism was assessed by 3 studies comprising 4662 participants.

**Results:** Under dominant model, Sst I polymorphism was borderline significantly associated with CHD risk (S1S2+S2S2 vs. S1S1, pooled OR=1.19, 95% CI 1.00-1.42). Subgroup analyses suggested that Sst I polymorphism was significantly associated with myocardial infarction (MI) risk (pooled OR=1.42, 95% CI 1.06-1.91), and Sst I polymorphism was statistically associated with CHD risk among Asian population (pooled OR=1.35, 95% CI 1.08-1.69) and in retrospective studies (pooled OR=1.30,

1  
2  
3  
4 95% CI 1.04-1.61). Significant association was observed between T-455C  
5  
6 polymorphism and CHD risk (TC+CC vs. TT, pooled OR=1.22, 95% CI 1.06-1.42).  
7

8  
9 A borderline significant association was suggested between T-455C polymorphism  
10  
11 and MI risk (pooled OR=1.21, 95% CI 1.00-1.46). C-482T and C1100T  
12  
13 polymorphisms were not indicated to be associated with CHD risk or MI risk.  
14

15  
16 **Conclusions:** ApoC3 Sst I and T-455C polymorphisms might be associated with  
17  
18 CHD risk.  
19

### Article focus

The aim of this study was to systematically evaluate the association between apolipoprotein C3 polymorphisms and CHD risk.

### Key message

This study shows that ApoC3 Sst I and T-455C polymorphisms might be associated with CHD risk.

### Strengths and limitations of the study

The present study comprehensively evaluated the association between ApoC3 polymorphisms, including Sst I, T-455C, C-482T, C1100T and CHD risk. The methods of this study were rigorous and were based on guidelines for conducting and reporting systematic reviews.

Most of the included studies were from Asia, Europe and USA, so the conclusions may not be true for other ethnic groups. Besides, between-study heterogeneity could not be completely explained.

## Introduction

The progression of CHD is complicated and is influenced by multi genetic and environmental factors, and atherosclerosis of coronary artery is the basic pathogenic factor of CHD<sup>1</sup>. Plasma lipids and lipoproteins are important risk factors for atherosclerosis, and genes involved in lipoprotein metabolism might be candidate genes for CHD susceptibility<sup>2 3</sup>. Apolipoprotein C3 (ApoC3) is an essential component of circulating particles in TG-rich lipoprotein, and inhibits the hydrolysis of TG-rich particles by the lipoprotein lipase and their hepatic uptake mediated by Apolipoprotein E<sup>4</sup>. Therefore, high levels of ApoC3 may cause hypertriglyceridemia<sup>5</sup>. Previous studies supported that ApoC3 might play an important role in CHD development, and the ApoC3 concentration was also associated with CHD risk<sup>6 7</sup>.

Serum ApoC3 concentration was shown to be influenced by genetic and acquired factors<sup>8</sup>. Several polymorphisms have been found in ApoC3 gene, including C-482T, T-455C, Sst I, C1100T polymorphism<sup>9-12</sup>. In recent years, studies have investigated the correlation between these polymorphisms and CHD risk, while the results were inconsistent. The aim of our meta-analysis was to assess the association between ApoC3 polymorphisms and risk of CHD.

## Methods

### Literature search

Systematic literature searches were conducted before March 2013 in Pubmed, Embase and Cochrane library databases without restrictions. Combination of the following terms were applied: “coronary heart disease” OR “coronary artery disease” OR “myocardial infarction” OR “acute coronary syndrome” OR “ischemic heart disease” OR “cardiovascular disease” OR “major adverse cardiac event” OR “CHD” OR “CAD” OR “MI” OR “ACS” OR “IHD” OR “MACE”; “apolipoprotein C3” OR “apolipoprotein C” OR “apolipoprotein C- III” OR “apolipoprotein C III” OR “APO C3” OR “APOC3” OR “APOC” OR “APO C III” OR “APO C- III”; “polymorphism” OR “variant” OR “SNP” OR “mutation”. References of relevant articles were also scanned for studies potentially missed in the primary searches. Articles published in English were retrieved. And the retrieved studies were carefully examined to exclude potential duplicates or overlapping data. This meta-analysis was designed, conducted and reported according to PRISMA statement<sup>13</sup>.

### Selection criteria, data extraction and study quality assessment

Studies retrieved from the initial search were then screened for eligible articles. Titles and abstracts were scanned and then full papers were reviewed. We included articles if they met all the following criteria: (1) evaluating the association between ApoC3 polymorphism and coronary heart disease and (or) MI; (2) odds ratio (OR) estimates and their 95% confidence intervals (95%CI) were available or could be calculated; (3) each polymorphism included in the meta-analysis should be reported

1  
2  
3  
4 by at least two studies.

5  
6 Data were extracted independently by two reviewers (Bin Lin and Yiwei Huang).  
7  
8 The following information was extracted from each study: first author, publication  
9  
10 year, country, study design, sample size, gender distribution, mean age, phenotype  
11  
12 (disease), genotype of cases and controls, whether the polymorphism(s) evaluated was  
13  
14 in Hardy-Weinberg equilibrium or not, and the genotyping assay method. Any  
15  
16 discrepancy was resolved by a third investigator. Newcastle-Ottawa Scale (NOS)  
17  
18 method was applied to assess the study quality<sup>14</sup>. The NOS contains eight items and  
19  
20 the score ranged from 0 to 9.  
21  
22  
23  
24  
25

### 26 **Statistical analysis**

27  
28  
29 Dominant model was applied in this study as this genetic model was most widely  
30  
31 used in the included studies. Because some studies did not apply dominant model, we  
32  
33 re-calculated OR values under dominant model. Either a fixed-effects model or a  
34  
35 random-effects model was applied to pool the OR estimates of each study, according  
36  
37 to heterogeneity across studies. The extent of heterogeneity was checked using the  
38  
39 chi-square test and  $I^2$  test;  $p \leq 0.10$  and/or  $I^2 > 50\%$  indicates significant heterogeneity.  
40  
41  
42 When  $p > 0.10$ , the fixed-effects model was applied and otherwise we used the  
43  
44 random-effects model. Subgroup analysis was applied to explore heterogeneity.  
45  
46  
47 Study-specific ORs of CHD were firstly pooled and then we evaluated the association  
48  
49 between ApoC3 polymorphisms and MI risk separately. Funnel plots were constructed  
50  
51 and Begg's and Egger's tests were used to assess publication bias, and  $p \leq 0.10$  was  
52  
53 considered to be significant. All analyses were conducted using the Stata software  
54  
55  
56  
57  
58  
59  
60

(version 11.0; StatCorp, College Station, TX, USA).

## Results

### Study selection and characteristics

A total of 1532 articles were identified by searching Pubmed, Embase and Cochrane library databases. Among them, 1482 articles were excluded through screening titles and abstracts. The remaining 50 articles were carefully evaluated as full texts and 30 articles were excluded. The reasons for exclusion were articles not on right topic (15 papers), insufficient data (6 papers), relevant reviews (8 papers) and duplicate reports from the same study (1 paper). This meta-analysis finally included 20 articles<sup>9-12 15-30</sup>. The selection process was shown in Figure 1 while the characteristics of those studies were listed in Supplementary Table 1. Among these studies, fifteen studies assessed ApoC3 Sst I polymorphism, four studies evaluated ApoC3 T-455C polymorphism, four studies reported ApoC3 C-482T polymorphism and three investigated ApoC3 C1100T polymorphism (several studies reported more than one polymorphism). The results of quality assessment were shown in the Supplementary Table 2 and the score of the included studies ranged from 5 to 9.

### AOPC3 polymorphisms and risk of CHD

#### Meta-analysis of Sst I polymorphism

A total of 15 studies with 11539 individuals assessed the association between Sst I polymorphism and CHD risk. Fourteen studies were in Hardy-Weinberg equilibrium while one study did not report whether Sst I polymorphism was in Hardy-Weinberg equilibrium or not<sup>22</sup>. Most of the study used restriction fragment length polymorphism

1  
2  
3  
4 (RFLP) method for DNA genotyping (n=14) and one study applied immobilized  
5  
6 oligonucleotide probes array (IOPA) method<sup>24</sup>. Multivariable OR could be extracted  
7  
8 from 4 studies<sup>10 20 22 24</sup> (Supplementary Table 3). Under dominant model (S1S2+S2S2  
9  
10 vs. S1S1), the pooled univariate OR of all studies was 1.19 (95% CI 1.00-1.42)  
11  
12 (Figure 2, Table 1), indicating a borderline significant association between Sst I  
13  
14 polymorphism and CHD risk. There was significant heterogeneity among studies ( $I^2 =$   
15  
16 48.9%,  $p=0.017$ ) (Figure 2, Table 1). The pooled multivariable OR was 1.11  
17  
18 (0.73-1.70), did not suggest a significant association.  
19  
20  
21  
22

23  
24 According to study characteristics, subgroup analysis was adopted, as shown in  
25  
26 Table 2. Pooled results showed that S1S2 and S2S2 genotypes might increase risk of  
27  
28 CHD in Asian population (pooled OR=1.35, 95% CI 1.08-1.69) but not in Caucasian  
29  
30 population (pooled OR=1.14, 95% CI 0.92-1.41). Study design could also influence  
31  
32 the result, Sst I polymorphism was significantly associated with CHD risk in  
33  
34 retrospective studies (pooled OR=1.30, 95% CI 1.04-1.61) but not in prospective  
35  
36 studies (pooled OR=0.98, 95% CI 0.75-1.28). Besides, Sst I polymorphism was  
37  
38 observed to be significantly associated with MI risk (pooled OR=1.42, 95% CI  
39  
40 1.06-1.91) but not CHD risk (pooled OR=1.09, 95% CI 0.87-1.35). After excluding  
41  
42 the study did not report Hardy-Weinberg equilibrium, the pooled OR was 1.24 (95%  
43  
44 CI 1.04-1.47). The pooled OR of the studies applied RFLP method was 1.19 (95% CI  
45  
46 0.98-1.44).  
47  
48  
49  
50  
51  
52

### 53 54 **Meta-analysis of T-455C polymorphism**

55  
56 The association between T-455C polymorphism and CHD risk was evaluated by 4  
57  
58  
59  
60



1  
2  
3  
4 studies comprising 3378 individuals. All the studies were in Hardy-Weinberg  
5  
6 equilibrium. Immobilized oligonucleotide probes array method was used by three  
7  
8 studies while real-time fluorescence quantitative PCR was applied by one study<sup>9</sup>.  
9  
10 Only one study reported a multivariable OR of 1.82 (95% CI 1.05-3.18), while the  
11  
12 unadjusted OR was 1.15 (98% CI 0.85-1.55)<sup>17</sup> (Supplementary Table 3). Results  
13  
14 indicated significant association between T-455C polymorphism and CHD risk  
15  
16 (TC+CC vs. TT, pooled OR=1.22, 95% CI 1.06-1.42) (Figure 3, Table 1). No  
17  
18 significant heterogeneity among studies was indicated ( $I^2 = 0\%$ ,  $p=0.580$ ) (Figure 3,  
19  
20 Table 1). Two studies reported the association between T-455C polymorphism and  
21  
22 MI risk, and the pooled result suggested a borderline significant association (pooled  
23  
24 OR=1.21, 95% CI 1.00-1.46).  
25  
26  
27  
28  
29  
30

### 31 **Meta-analysis of C-482T polymorphism**

32  
33  
34 Four studies with 3070 individuals reported the association between C-482T  
35  
36 polymorphism and CHD risk. Only one study did not report whether C-482T  
37  
38 polymorphism was in Hardy-Weinberg equilibrium or not<sup>22</sup>. Two studies applied  
39  
40 real-time fluorescence quantitative PCR method<sup>9 16</sup>, one study used RFLP method<sup>22</sup>  
41  
42 and the other study adopted immobilized oligonucleotide probes array method<sup>19</sup>.  
43  
44 Multivariable OR could be extracted from two studies<sup>16 18</sup> (Supplementary Table 3).  
45  
46 There was no significant association between C-482T polymorphism and CHD risk  
47  
48 (CT+TT vs. CC, pooled OR=1.06, 95% CI 0.92-1.22) (Figure 4, Table 1). No  
49  
50 significant heterogeneity was observed ( $I^2 = 0\%$ ,  $p=0.788$ ) (Figure 4, Table 1). Only  
51  
52 one study reported the association between C-482T polymorphism and MI risk  
53  
54  
55  
56  
57  
58  
59  
60

(OR=1.12, 95% CI 0.88-1.43)<sup>19</sup>.

### **Meta-analysis of C1100T polymorphism**

Three studies comprising 4662 participants evaluated the association between C1100T polymorphism and CHD risk. Two studies adopted immobilized oligonucleotide probes array method<sup>19,24</sup> and one study used RFLP method<sup>22</sup>. No significant association was found (CT+TT vs. CC, pooled OR=1.06, 95% CI 0.89-1.27) and no significant heterogeneity was observed ( $I^2 = 46.7\%$ ,  $p=0.153$ ) (Figure 5, Table 1). One study evaluated the association between C1100T polymorphism and MI risk (OR=1.18, 95% CI 0.93-1.51)<sup>19</sup>.

### **Publication bias**

Begg's and Egger's tests suggested that no publication bias was found in our meta-analyses.

### **Discussion**

ApoC3 is a glycoprotein synthesized mainly in the liver and the intestinal, and plays an essential role in regulating the serum triglyceride levels. Besides, it can strongly regulate the levels of VLDL and small dense LDL which potentially improves atherosclerosis<sup>31</sup>. Clinical research found that ApoC3 levels were predictor of risk for development of CHD<sup>32-34</sup>. In the present study, twenty studies were included and four polymorphisms of ApoC3 were evaluated, including C-482T, T-455C, Sst I and C1100T polymorphisms. T-455C polymorphism was suggested to be significantly associated with CHD risk, and 'C' allele increased CHD risk by 22 percent (CT+TT vs. CC, pooled OR=1.22, 95% CI 1.06-1.42). A borderline

1  
2  
3  
4 significant association was observed between Sst I polymorphism and CHD risk.  
5  
6 While no evidence suggested significant association between C-482T and C1100T  
7  
8 polymorphisms and CHD risk. Subgroup analysis was applied for Sst I polymorphism,  
9  
10 and we found that Sst I polymorphism was significantly associated with MI risk.  
11  
12 Besides, Sst I polymorphism was significantly associated with CHD risk in Asian  
13  
14 population but not in Caucasian population, indicating that the effect of Sst I  
15  
16 polymorphism might be influenced by ethnicity. For retrospective studies, Sst I was  
17  
18 indicated to be significantly associated with CHD risk but this association was not  
19  
20 confirmed in prospective studies. So, the association between Sst I polymorphism and  
21  
22 CHD risk should be interpreted cautiously.  
23  
24  
25  
26  
27

28  
29 The mechanism of Sst I polymorphism in CHD susceptibility may be multiple.  
30  
31 Sst I polymorphism is located in 3' untranslated region of the ApoC3 gene, and it is  
32  
33 possible that this polymorphism is in linkage disequilibrium with other functional  
34  
35 polymorphism in the nearby region, such as T-455C polymorphism<sup>10</sup>. Sst I  
36  
37 polymorphism might alter plasma lipid concentrations. Several studies showed S2  
38  
39 carriers have higher plasma total cholesterol, TG and LDL-C levels<sup>12 35 36</sup>, though  
40  
41 other studies did not demonstrate significant difference<sup>10 20 37</sup>. Besides, it has been  
42  
43 shown that S2 allele might significantly influence dyslipidemic state and  
44  
45 atherosclerosis severity when patients changed their diet from saturated fatty acids to  
46  
47 olive oil<sup>38</sup>. So, Sst I polymorphism plays an important role in modulating lipid levels  
48  
49 response to dietary changes.  
50  
51  
52  
53  
54  
55

56 T-455C and C-482T polymorphisms both located in the 5' promoter region and  
57  
58  
59  
60

1  
2  
3  
4 were in strong linkage disequilibrium with each other. These two polymorphisms  
5  
6 have been studied extensively because they could alter the nuclear transcript factors  
7  
8 which mediate the insulin response. Significant association between T-455C  
9  
10 polymorphism and risk of CHD was found under dominant model. However, it should  
11  
12 be noted that in the 4 studies evaluating T-455C polymorphism, only one study<sup>24</sup>  
13  
14 showed a significant association between T-455C polymorphism and CHD risk. So,  
15  
16 more studies with large sample size are warranted to clarify this issue. For C-482T  
17  
18 polymorphism, no significant association with CHD risk was found.  
19  
20  
21  
22

23  
24 Different mechanisms could be linked to this finding. In previous works, T-455C  
25  
26 polymorphism was associated with increased TG and ApoC3 levels<sup>24 39</sup>. Also, T-455C  
27  
28 polymorphism was demonstrated to be significantly associated with metabolic  
29  
30 syndrome<sup>39</sup>. Another study showed T-455C polymorphism could interfere with n-3  
31  
32 polyunsaturated fatty acids on ApoC3 concentrations<sup>7</sup>. Olivieri O *et al.* found that CC  
33  
34 homozygous carriers were poorly responsive to the ApoC3 lowering effects of n-3  
35  
36 polyunsaturated fatty acids<sup>7</sup>.  
37  
38  
39  
40

41  
42 The present meta-analysis has several strengths. First, this study was based on  
43  
44 guidelines for conducting and reporting systematic reviews and the methods were  
45  
46 rigorous. Second, we comprehensively evaluated the association between ApoC3  
47  
48 polymorphisms and CHD risk, and a total of four polymorphisms of ApoC3 were  
49  
50 assessed. Besides, no publication bias was observed, indicating the pooled results  
51  
52 might be unbiased.  
53  
54  
55

56  
57 The current analysis also has several limitations. First, most of the included studies  
58  
59  
60

1  
2  
3 investigated Asian or Caucasian population, so the conclusions may not be true for  
4  
5 other ethnic groups. Second, significant heterogeneity was found and could not be  
6  
7 completely explained when assess some polymorphisms. Third, only Pubmed,  
8  
9 Embase and Cochrane library were searched for eligible articles. Finally, only articles  
10  
11 published in English were included.  
12  
13  
14

15  
16 Some questions remain unanswered in the present study. Most of the studies did not  
17  
18 report multivariable OR, so it is not clear whether ApoC3 polymorphisms could be an  
19  
20 independent predictor of CHD risk or not. More studies are warranted to clarify this  
21  
22 issue. Different genotyping assay methods were applied in the included studies, which  
23  
24 might call for different results. And it should be noted that ApoC3 polymorphisms are  
25  
26 non-modified risk factors, and little control methods over them were accessible.  
27  
28 However, people in high risk groups (such as S2 carriers of Sst I polymorphism)  
29  
30 might be advised to go for regular checkups to reduce the risk of adverse cardiac  
31  
32 event. Detecting ApoC3 polymorphisms may help people be aware of the risk of CHD.  
33  
34 With the current level of evidence, we cannot comment on the optimal genotyping  
35  
36 assay method and the cost-effectiveness of detecting ApoC3 polymorphisms. Further  
37  
38 research is needed to explore combination of variables associated with CHD risk to  
39  
40 develop a predictive model with a high discriminative capacity.  
41  
42  
43  
44  
45  
46  
47

48  
49 In summary, ApoC3 Sst I and T-455C polymorphisms might be associated with  
50  
51 CHD risk, while no evidence suggested significant association between C-482T and  
52  
53 C1100T polymorphisms and CHD risk.  
54  
55  
56  
57  
58  
59  
60

**Acknowledgements:**

The Corresponding Authors (Drs. Bin Lin and Yihua Wu) have the right to grant on behalf of all authors and does grant on behalf of all authors. Drs. Bin Lin and Yihua Wu contributed to conception, design of the study, and editing the manuscript; Drs. Yiwei Huang and Mingying Zhang contributed to data acquisition, analysis, and interpretation of the data. Dr. Jun Wang contributed to statistical analysis and editing the manuscript.

**Contributorship:** The Corresponding Authors (Drs. Bin Lin and Yihua Wu) have the right to grant on behalf of all authors and does grant on behalf of all authors. Drs. Bin Lin and Yihua Wu contributed to conception, design of the study, and editing the manuscript; Drs. Yiwei Huang and Mingying Zhang contributed to data acquisition, analysis, and interpretation of the data. Dr. Jun Wang contributed to statistical analysis and editing the manuscript.

**Data sharing statement:** No additional data are available.

**Competing:** We declare that we have no conflict of interest.

**Reference:**

1. Ross R. Atherosclerosis--an inflammatory disease. *N Engl J Med* 1999;340:115-26.
2. Jensen MK, Rimm EB, Rader D, *et al.* S447X variant of the lipoprotein lipase gene, lipids, and risk of coronary heart disease in 3 prospective cohort studies. *Am Heart J* 2009;157:384-90.
3. Nordestgaard BG, Benn M, Schnohr P, *et al.* Nonfasting triglycerides and risk of myocardial infarction, ischemic heart disease, and death in men and women. *JAMA* 2007;298:299-308.
4. Windler E, Havel RJ. Inhibitory effects of C apolipoproteins from rats and humans on the uptake of triglyceride-rich lipoproteins and their remnants by the perfused rat liver. *J Lipid Res* 1985;26:556-65.
5. Jong MC, Hofker MH, Havekes LM. Role of ApoCs in lipoprotein metabolism: functional differences between ApoC1, ApoC2, and ApoC3. *Arterioscler Thromb Vasc Biol* 1999;19:472-84.
6. Hodis HN, Mack WJ, Azen SP, *et al.* Triglyceride- and cholesterol-rich lipoproteins have a differential effect on mild/moderate and severe lesion progression as assessed by quantitative coronary angiography in a controlled trial of lovastatin. *Circulation* 1994;90:42-9.
7. Olivieri O, Martinelli N, Sandri M, *et al.* Apolipoprotein C-III, n-3 polyunsaturated fatty acids, and "insulin-resistant" T-455C APOC3 gene polymorphism in heart disease patients: example of gene-diet interaction. *Clin Chem* 2005;51:360-7.
8. Tilly P, Sass C, Vincent-Viry M, *et al.* Biological and genetic determinants of serum apoC-III concentration: reference limits from the Stanislas Cohort. *J Lipid Res* 2003;44:430-6.
9. Yu J, Huang J, Liang Y, *et al.* Lack of association between apolipoprotein C3 gene polymorphisms and risk of coronary heart disease in a Han population in East China. *Lipids Health Dis* 2011;10:200.
10. Sediri Y, Kallel A, Feki M, *et al.* Association of a DNA polymorphism of the apolipoprotein AI-CIII-AIV gene cluster with myocardial infarction in a Tunisian population. *Eur J Intern Med* 2011;22:407-11.
11. Bhanushali AA, Das BR. Influence of genetic variants in the apolipoprotein A5 and C3 gene on lipids, lipoproteins, and its association with coronary artery disease in Indians. *J Community Genet* 2010;1:139-48.
12. Abd El-Aziz TA, Mohamed RH, Hashem RM. Association of lipoprotein lipase and apolipoprotein C-III genes polymorphism with acute myocardial infarction in diabetic patients. *Mol Cell Biochem* 2011;354:141-50.
13. Moher D, Liberati A, Tetzlaff J, *et al.* Preferred reporting items for systematic reviews and meta-analyses: the PRISMA statement. *Ann Intern Med* 2009;151:264-9, W64.
14. Stang A. Critical evaluation of the Newcastle-Ottawa scale for the assessment of the quality of nonrandomized studies in meta-analyses. *Eur J Epidemiol* 2010;25:603-5.
15. AshokKumar M, Subhashini NG, SaiBabu R, *et al.* Genetic variants on apolipoprotein gene cluster influence triglycerides with a risk of coronary artery disease among Indians. *Mol Biol Rep* 2010;37:521-7.
16. Muendlein A, Saely CH, Marte T, *et al.* Synergistic effects of the apolipoprotein E epsilon3/epsilon2/epsilon4, the cholesteryl ester transfer protein TaqIB, and the apolipoprotein C3 -482 C>T polymorphisms on their association with coronary artery disease. *Atherosclerosis* 2008;199:179-86.
17. Martinelli N, Trabetti E, Bassi A, *et al.* The -1131 T>C and S19W APOA5 gene polymorphisms



- 1  
2  
3 are associated with high levels of triglycerides and apolipoprotein C-III, but not with  
4 coronary artery disease: an angiographic study. *Atherosclerosis* 2007;191:409-17.
- 5  
6 18. Dallongeville J, Cottel D, Montaye M, *et al.* Impact of APOA5/A4/C3 genetic polymorphisms on  
7 lipid variables and cardiovascular disease risk in French men. *Int J Cardiol* 2006;106:152-6.
- 8  
9 19. Tobin MD, Braund PS, Burton PR, *et al.* Genotypes and haplotypes predisposing to myocardial  
10 infarction: a multilocus case-control study. *Eur Heart J* 2004;25:459-67.
- 11  
12 20. Liu S, Song Y, Hu FB, *et al.* A prospective study of the APOA1 XmnI and APOC3 SstI  
13 polymorphisms in the APOA1/C3/A4 gene cluster and risk of incident myocardial infarction  
14 in men. *Atherosclerosis* 2004;177:119-26.
- 15  
16 21. Chhabra S, Narang R, Lakshmy R, *et al.* Apolipoprotein C3 SstI polymorphism in the risk  
17 assessment of CAD. *Mol Cell Biochem* 2004;259:59-66.
- 18  
19 22. Wong WM, Hawe E, Li LK, *et al.* Apolipoprotein AIV gene variant S347 is associated with  
20 increased risk of coronary heart disease and lower plasma apolipoprotein AIV levels. *Circ*  
21 *Res* 2003;92:969-75.
- 22  
23 23. Izar MC, Fonseca FA, Ihara SS, *et al.* Risk Factors, biochemical markers, and genetic  
24 polymorphisms in early coronary artery disease. *Arq Bras Cardiol* 2003;80:379-95.
- 25  
26 24. Olivieri O, Stranieri C, Bassi A, *et al.* ApoC-III gene polymorphisms and risk of coronary artery  
27 disease. *J Lipid Res* 2002;43:1450-7.
- 28  
29 25. Russo GT, Meigs JB, Cupples LA, *et al.* Association of the Sst-I polymorphism at the APOC3  
30 gene locus with variations in lipid levels, lipoprotein subclass profiles and coronary heart  
31 disease risk: the Framingham offspring study. *Atherosclerosis* 2001;158:173-81.
- 32  
33 26. Wick U, Witt E, Engel W. Restriction fragment length polymorphisms at the apoprotein genes AI,  
34 CIII and B-100 and in the 5' flanking region of the insulin gene as possible markers of  
35 coronary heart disease. *Clin Genet* 1995;47:184-90.
- 36  
37 27. Vavatsi NA, Kouidou SA, Geleris PN, *et al.* Increased frequency of the rare PstI allele (P2) in a  
38 population of CAD patients in northern Greece. *Clin Genet* 1995;47:22-6.
- 39  
40 28. Rigoli L, Raimondo G, Di Benedetto A, *et al.* Apolipoprotein AI-CIII-AIV genetic  
41 polymorphisms and coronary heart disease in type 2 diabetes mellitus. *Acta Diabetol*  
42 1995;32:251-6.
- 43  
44 29. Miettinen HE, Korpela K, Hamalainen L, *et al.* Polymorphisms of the apolipoprotein and  
45 angiotensin converting enzyme genes in young North Karelian patients with coronary heart  
46 disease. *Hum Genet* 1994;94:189-92.
- 47  
48 30. Kee F, Amouyel P, Fumeron F, *et al.* Lack of association between genetic variations of apo  
49 A-I-C-III-A-IV gene cluster and myocardial infarction in a sample of European male:  
50 ECTIM study. *Atherosclerosis* 1999;145:187-95.
- 51  
52 31. Sacks FM, Zheng C, Cohn JS. Complexities of plasma apolipoprotein C-III metabolism. *J Lipid*  
53 *Res* 2011;52:1067-70.
- 54  
55 32. Onat A, Erginel-Unaltuna N, Coban N, *et al.* APOC3 -482C>T polymorphism, circulating  
56 apolipoprotein C-III and smoking: interrelation and roles in predicting type-2 diabetes and  
57 coronary disease. *Clin Biochem* 2011;44:391-6.
- 58  
59 33. Olivieri O, Martinelli N, Girelli D, *et al.* Apolipoprotein C-III predicts cardiovascular mortality in  
60 severe coronary artery disease and is associated with an enhanced plasma thrombin  
generation. *J Thromb Haemost* 2010;8:463-71.
34. Sacks FM, Alaupovic P, Moye LA, *et al.* VLDL, apolipoproteins B, CIII, and E, and risk of



- 1  
2  
3 recurrent coronary events in the Cholesterol and Recurrent Events (CARE) trial. *Circulation*  
4 2000;102:1886-92.
- 5 35. Arai H, Yamamoto A, Matsuzawa Y, *et al.* Polymorphisms in four genes related to triglyceride  
6 and HDL-cholesterol levels in the general Japanese population in 2000. *J Atheroscler*  
7 *Thromb* 2005;12:240-50.
- 8 36. Buzza M, Fripp Y, Mitchell RJ. Apolipoprotein AI and CIII gene polymorphisms and their  
9 association with lipid levels in Italian, Greek and Anglo-Irish populations of Australia. *Ann*  
10 *Hum Biol* 2001;28:481-90.
- 11 37. Corella D, Guillen M, Saiz C, *et al.* Associations of LPL and APOC3 gene polymorphisms on  
12 plasma lipids in a Mediterranean population: interaction with tobacco smoking and the  
13 APOE locus. *J Lipid Res* 2002;43:416-27.
- 14 38. Perez-Martinez P, Gomez P, Paz E, *et al.* Interaction between smoking and the SstI polymorphism  
15 of the apo C-III gene determines plasma lipid response to diet. *Nutr Metab Cardiovasc Dis*  
16 2001;11:237-43.
- 17 39. Olivieri O, Bassi A, Stranieri C, *et al.* Apolipoprotein C-III, metabolic syndrome, and risk of  
18 coronary artery disease. *J Lipid Res* 2003;44:2374-81.
- 19  
20  
21  
22  
23  
24  
25  
26  
27  
28  
29  
30  
31  
32  
33  
34  
35  
36  
37  
38  
39  
40  
41  
42  
43  
44  
45  
46  
47  
48  
49  
50  
51  
52  
53  
54  
55  
56  
57  
58  
59  
60

1  
2  
3  
4  
5  
6  
7  
8  
9  
10  
11  
12  
13  
14  
15  
16  
17  
18  
19  
20  
21  
22  
23  
24  
25  
26  
27  
28  
29  
30  
31  
32  
33  
34  
35  
36  
37  
38  
39  
40  
41  
42  
43  
44  
45  
46  
47  
48  
49

**Table 1** Meta-analysis results of Sst I, T-455C, C-482T, C1100T polymorphisms

| Polymorphism | No. of studies | No. of participants | Comparison         | OR (95% CI)      | Heterogeneity      |       |
|--------------|----------------|---------------------|--------------------|------------------|--------------------|-------|
|              |                |                     |                    |                  | I <sup>2</sup> (%) | P     |
| Sst I        | 15             | 11539               | S1S2+S2S2 vs. S1S1 | 1.19 (1.00-1.42) | 48.9               | 0.017 |
| T-455C       | 4              | 3378                | TC+CC vs. TT       | 1.22 (1.06-1.42) | 0                  | 0.580 |
| C-482T       | 4              | 3070                | CT+TT vs. CC       | 1.06 (0.92-1.22) | 0                  | 0.788 |
| C1100T       | 3              | 4662                | CT+TT vs. CC       | 1.06 (0.89-1.27) | 46.7               | 0.153 |

**Table 2** Subgroup analysis of Sst I polymorphism

| Groups       |               | OR (95% CI)      | Heterogeneity      |       |
|--------------|---------------|------------------|--------------------|-------|
|              |               |                  | I <sup>2</sup> (%) | P     |
| Ethnicity    | Caucasian     | 1.14 (0.92-1.41) | 54.2               | 0.013 |
|              | Asian         | 1.35 (1.08-1.69) | 0                  | 0.427 |
| Study design | Retrospective | 1.30 (1.04-1.61) | 39.0               | 0.098 |
|              | Prospective   | 0.98 (0.75-1.28) | 52.3               | 0.098 |
| Phenotype    | CHD           | 1.09 (0.87-1.35) | 46.0               | 0.047 |
|              | MI            | 1.42 (1.06-1.91) | 52.3               | 0.099 |

**Figure legends**

**Figure 1.** Flow diagram of study selection process.

**Figure 2.** Association between Sst I polymorphism and CHD risk.

1  
2  
3  
4  
5  
6  
7 **Figure 3.** Association between T-455C polymorphism and CHD risk.  
8

9  
10 **Figure 4.** Association between C-482T polymorphism and CHD risk.  
11

12 **Figure 5.** Association between C1100T polymorphism and CHD risk.  
13  
14  
15  
16

17 **Supplementary file.**  
18

19  
20 **Supplementary Table 1** Characteristics of the included studies  
21

22 **Supplementary Table 2** Quality assessment of the included studies  
23

24 **Supplementary Table 3** Studies reporting multivariable OR  
25

26  
27 **Checklist** PRISMA checklist  
28  
29  
30  
31  
32  
33  
34  
35  
36  
37  
38  
39  
40  
41  
42  
43  
44  
45  
46  
47  
48  
49

1  
2  
3  
4 **Association between apolipoprotein C3 Sst I, T-455C, C-482T and C1100T**

5  
6 **polymorphisms and risk of coronary heart disease**

7  
8  
9 Bin Lin<sup>1\*</sup>, Yiwei Huang<sup>1</sup>, Mingying Zhang<sup>1</sup>, Jun Wang<sup>1</sup>, Yihua Wu<sup>2\*</sup>

10  
11 <sup>1</sup>Department of Cardiology, Wenzhou Central Hospital, Wenzhou, 325000 China;

12  
13 <sup>2</sup>Department of Epidemiology and Health Statistics, Zhejiang University School of  
14  
15 Public Health, Hangzhou, 310058 China;

16  
17  
18 (Running title: ApoC3 polymorphisms and CHD risk)

19  
20  
21 \*Corresponding Authors:

22  
23  
24 Bin Lin, MD, Department of Cardiology, Wenzhou Central Hospital, Wenzhou,  
25  
26 325000 China;

27  
28  
29 Tel: 13706670776

30  
31 E-mail: [d4c3b2a@sina.com](mailto:d4c3b2a@sina.com)

32  
33  
34 Yihua Wu, PhD, Department of Epidemiology and Health Statistics, Zhejiang  
35  
36 University School of Public Health, Hangzhou, 310058 China;

37  
38  
39 Tel/Fax: 86-0571-88208140

40  
41  
42 E-mail: [georgewuer@126.com](mailto:georgewuer@126.com)

43  
44  
45  
46 We declare that we have no conflict of interest.  
47  
48  
49  
50  
51  
52  
53  
54  
55  
56  
57  
58  
59  
60

## Abstract

**Objectives:** Apolipoprotein C3 (ApoC3) polymorphisms have been suggested to be associated with risk of coronary heart disease (CHD). However, the results of relevant studies were inconsistent. We aimed to systematically evaluate this issue.

**Design:** Pubmed, Embase and Cochrane library databases (up to March 2013) were systematically searched to identify studies evaluating the association between ApoC3 polymorphisms and CHD risk. Two reviewers independently identified studies, extracted and analyzed data. Either a fixed- or a random-effects model was adopted to estimate overall odds ratios (ORs).

**Studies reviewed:** Finally, twenty studies comprising 15591 participants were included in this systematic review. Fifteen studies with 11539 individuals were included in the meta-analysis of Sst I polymorphism, four studies comprising 3378 individuals assessed T-455C polymorphism, four studies with 3070 participants evaluated C-482T polymorphism and C1100T polymorphism was assessed by 3 studies comprising 4662 participants.

**Results:** Under dominant model, Sst I polymorphism was borderline significantly associated with CHD risk (S1S2+S2S2 vs. S1S1, pooled OR=1.19, 95% CI 1.00-1.42). Subgroup analyses suggested that Sst I polymorphism was significantly associated with myocardial infarction (MI) risk (pooled OR=1.42, 95% CI 1.06-1.91), and Sst I polymorphism was statistically associated with CHD risk among Asian population (pooled OR=1.35, 95% CI 1.08-1.69) and in retrospective studies (pooled OR=1.30, 95% CI 1.04-1.61). Significant association was observed between T-455C

1  
2  
3  
4 polymorphism and CHD risk (TC+CC vs. TT, pooled OR=1.22, 95% CI 1.06-1.42).

5  
6 A borderline significant association was suggested between T-455C polymorphism  
7  
8 and MI risk (pooled OR=1.21, 95% CI 1.00-1.46). C-482T and C1100T  
9  
10 polymorphisms were not indicated to be associated with CHD risk or MI risk.  
11

12  
13 **Conclusions:** ApoC3 Sst I and T-455C polymorphisms might be associated with  
14  
15 CHD risk.  
16

17  
18 **Key Words:** coronary heart disease, apolipoprotein C-III, genetic polymorphisms,  
19  
20 risk factors, meta-analysis.  
21  
22

#### 23 24 25 **Article focus**

26  
27 The aim of this study was to systematically evaluate the association between  
28  
29 apolipoprotein C3 polymorphisms and CHD risk.  
30  
31

#### 32 33 **Key message**

34  
35 This study shows that ApoC3 Sst I and T-455C polymorphisms might be associated  
36  
37 with CHD risk.  
38  
39

#### 40 41 **Strengths and limitations of the study**

42  
43 The present study comprehensively evaluated the association between ApoC3  
44  
45 polymorphisms, including Sst I, T-455C, C-482T, C1100T and CHD risk. The  
46  
47 methods of this study were rigorous and were based on guidelines for conducting and  
48  
49 reporting systematic reviews.  
50  
51

52  
53 Most of the included studies were from Asia, Europe and USA, so the conclusions  
54  
55 may not be true for other ethnic groups. Besides, between-study heterogeneity could  
56  
57 not be completely explained.  
58  
59  
60

## Introduction

The progression of CHD is complicated and is influenced by multi genetic and environmental factors, and atherosclerosis of coronary artery is the basic pathogenic factor of CHD<sup>1</sup>. Plasma lipids and lipoproteins are important risk factors for atherosclerosis, and genes involved in lipoprotein metabolism might be candidate genes for CHD susceptibility<sup>2 3</sup>. Apolipoprotein C3 (ApoC3) is an essential component of circulating particles in TG-rich lipoprotein, and inhibits the hydrolysis of TG-rich particles by the lipoprotein lipase and their hepatic uptake mediated by Apolipoprotein E<sup>4</sup>. Therefore, high levels of ApoC3 may cause hypertriglyceridemia<sup>5</sup>. Previous studies supported that ApoC3 might play an important role in CHD development, and the ApoC3 concentration was also associated with CHD risk<sup>6 7</sup>.

Serum ApoC3 concentration was shown to be influenced by genetic and acquired factors<sup>8</sup>. Several polymorphisms have been found in ApoC3 gene, including C-482T, T-455C, Sst I, C1100T polymorphism<sup>9-12</sup>. In recent years, studies have investigated the **correlation** between these polymorphisms and CHD risk, while the results were inconsistent. The aim of our meta-analysis was to assess the association between ApoC3 polymorphisms and risk of CHD.

## Methods

### Literature search

Systematic literature searches were conducted before March 2013 in Pubmed, Embase **and Cochrane library** databases without restrictions. Combination of the following terms were applied: “coronary heart disease” OR “coronary artery disease”

1  
2  
3  
4 OR “myocardial infarction” OR “acute coronary syndrome” OR “ischemic heart  
5  
6 disease” OR “cardiovascular disease” OR “major adverse cardiac event” OR “CHD”  
7  
8 OR “CAD” OR “MI” OR “ACS” OR “IHD” OR “MACE”; “apolipoprotein C3” OR  
9  
10 “apolipoprotein C” OR “apolipoprotein C- III” OR “apolipoprotein C III” OR “APO  
11  
12 C3” OR “APOC3” OR “APOC” OR “APO C III” OR “APO C- III”; “polymorphism”  
13  
14 OR “variant” OR “SNP” OR “mutation”. References of relevant articles were also  
15  
16 scanned for studies potentially missed in the primary searches. Articles published in  
17  
18 English were retrieved. And the retrieved studies were carefully examined to exclude  
19  
20 potential duplicates or overlapping data. This meta-analysis was designed, conducted  
21  
22 and reported according to PRISMA statement<sup>13</sup>.  
23  
24  
25  
26  
27  
28

### 29 **Selection criteria, data extraction and study quality assessment**

30  
31 Studies retrieved from the initial search were then screened for eligible articles.  
32  
33 Titles and abstracts were scanned and then full papers were reviewed. We included  
34  
35 articles if they met all the following criteria: (1) evaluating the association between  
36  
37 ApoC3 polymorphism and coronary heart disease and (or) MI; (2) odds ratio (OR)  
38  
39 estimates and their 95% confidence intervals (95%CI) were available or could be  
40  
41 calculated; (3) each polymorphism included in the meta-analysis should be reported  
42  
43 by at least two studies.  
44  
45  
46  
47

48  
49 Data were extracted independently by two reviewers (Bin Lin and Yiwei Huang).  
50  
51 The following information was extracted from each study: first author, publication  
52  
53 year, country, study design, sample size, gender distribution, mean age, phenotype  
54  
55 (disease), genotype of cases and controls, whether the polymorphism(s) evaluated was  
56  
57  
58  
59  
60



1  
2  
3  
4 in Hardy-Weinberg equilibrium or not, and the genotyping assay method. Any  
5  
6 discrepancy was resolved by a third investigator. Newcastle-Ottawa Scale (NOS)  
7  
8 method was applied to assess the study quality<sup>14</sup>. The NOS contains eight items and  
9  
10 the score ranged from 0 to 9.  
11

### 12 13 14 **Statistical analysis**

15  
16 Dominant model was applied in this study as this genetic model was most widely  
17  
18 used in the included studies. Because some studies did not apply dominant model, we  
19  
20 re-calculated OR values under dominant model. Either a fixed-effects model or a  
21  
22 random-effects model was applied to pool the OR estimates of each study, according  
23  
24 to heterogeneity across studies. The extent of heterogeneity was checked using the  
25  
26 chi-square test and  $I^2$  test;  $p \leq 0.10$  and/or  $I^2 > 50\%$  indicates significant heterogeneity.  
27  
28 When  $p > 0.10$ , the fixed-effects model was applied and otherwise we used the  
29  
30 random-effects model. Subgroup analysis was applied to explore heterogeneity.  
31  
32  
33  
34

35  
36 Study-specific ORs of CHD were firstly pooled and then we evaluated the association  
37  
38 between ApoC3 polymorphisms and MI risk separately. Funnel plots were constructed  
39  
40 and Begg's and Egger's tests were used to assess publication bias, and  $p \leq 0.10$  was  
41  
42 considered to be significant. All analyses were conducted using the Stata software  
43  
44 (version 11.0; StatCorp, College Station, TX, USA).  
45  
46  
47

## 48 49 **Results**

### 50 51 **Study selection and characteristics**

52  
53  
54 A total of 1532 articles were identified by searching Pubmed, Embase and  
55  
56 Cochrane library databases. Among them, 1482 articles were excluded through  
57  
58  
59  
60

1  
2  
3  
4 screening titles and abstracts. The remaining 50 articles were carefully evaluated as  
5  
6 full texts and 30 articles were excluded. The reasons for exclusion were articles not on  
7  
8 right topic (15 papers), insufficient data (6 papers), relevant reviews (8 papers) and  
9  
10 duplicate reports from the same study (1 paper). This meta-analysis finally included  
11  
12 20 articles<sup>9-12 15-30</sup>. The selection process was shown in Figure 1 while the  
13  
14 characteristics of those studies were listed in Supplementary Table 1. Among these  
15  
16 studies, fifteen studies assessed ApoC3 Sst I polymorphism, four studies evaluated  
17  
18 ApoC3 T-455C polymorphism, four studies reported ApoC3 C-482T polymorphism  
19  
20 and three investigated ApoC3 C1100T polymorphism (several studies reported more  
21  
22 than one polymorphism). The results of quality assessment were shown in the  
23  
24 Supplementary Table 2 and the score of the included studies ranged from 5 to 9.  
25  
26  
27  
28  
29  
30

### 31 **AOPC3 polymorphisms and risk of CHD**

#### 32 **Meta-analysis of Sst I polymorphism**

33  
34  
35  
36 A total of 15 studies with 11539 individuals assessed the association between Sst I  
37  
38 polymorphism and CHD risk. Fourteen studies were in Hardy-Weinberg equilibrium  
39  
40 while one study did not report whether Sst I polymorphism was in Hardy-Weinberg  
41  
42 equilibrium or not<sup>22</sup>. Most of the study used restriction fragment length polymorphism  
43  
44 (RFLP) method for DNA genotyping (n=14) and one study applied immobilized  
45  
46 oligonucleotide probes array (IOPA) method<sup>24</sup>. Multivariable OR could be extracted  
47  
48 from 4 studies<sup>10 20 22 24</sup> (Supplementary Table 3). Under dominant model (S1S2+S2S2  
49  
50 vs. S1S1), the pooled univariate OR of all studies was 1.19 (95% CI 1.00-1.42)  
51  
52 (Figure 2, Table 1), indicating a borderline significant association between Sst I  
53  
54  
55  
56  
57  
58  
59  
60

1  
2  
3 polymorphism and CHD risk. There was significant heterogeneity among studies ( $I^2 =$   
4 48.9%,  $p=0.017$ ) (Figure 2, Table 1). **The pooled multivariable OR was 1.11**  
5  
6 **(0.73-1.70), did not suggest a significant association.**  
7  
8

9  
10  
11 According to study characteristics, subgroup analysis was **adopted**, as shown in  
12  
13 Table 2. Pooled **results** showed that S1S2 and S2S2 genotypes might increase risk of  
14  
15 CHD in Asian population (pooled OR=1.35, 95% CI 1.08-1.69) but not in Caucasian  
16  
17 population (pooled OR=1.14, 95% CI 0.92-1.41). Study design could also influence  
18  
19 the result, Sst I polymorphism was significantly associated with CHD risk in  
20  
21 retrospective studies (pooled OR=1.30, 95% CI 1.04-1.61) but not in prospective  
22  
23 studies (pooled OR=0.98, 95% CI 0.75-1.28). Besides, Sst I polymorphism was  
24  
25 observed to be significantly associated with MI risk (pooled OR=1.42, 95% CI  
26  
27 1.06-1.91) but not CHD risk (pooled OR=1.09, 95% CI 0.87-1.35). **After excluding**  
28  
29 **the study did not report Hardy-Weinberg equilibrium, the pooled OR was 1.24 (95%**  
30  
31 **CI 1.04-1.47). The pooled OR of the studies applied RFLP method was 1.19 (95% CI**  
32  
33 **0.98-1.44).**  
34  
35  
36  
37  
38  
39  
40

#### 41 **Meta-analysis of T-455C polymorphism**

42  
43 The association between T-455C polymorphism and CHD risk was evaluated by 4  
44  
45 studies comprising 3378 individuals. **All the studies were in Hardy-Weinberg**  
46  
47 **equilibrium. Immobilized oligonucleotide probes array method was used by three**  
48  
49 **studies while real-time fluorescence quantitative PCR was applied by one study<sup>9</sup>.**  
50  
51 **Only one study reported a multivariable OR of 1.82 (95% CI 1.05-3.18), while the**  
52  
53 **unadjusted OR was 1.15 (98% CI 0.85-1.55)<sup>17</sup> (Supplementary Table 3). Results**  
54  
55  
56  
57  
58  
59  
60

1  
2  
3 indicated significant association between T-455C polymorphism and CHD risk  
4 (TC+CC vs. TT, pooled OR=1.22, 95% CI 1.06-1.42) (Figure 3, Table 1). No  
5  
6 (TC+CC vs. TT, pooled OR=1.22, 95% CI 1.06-1.42) (Figure 3, Table 1). No  
7  
8 significant heterogeneity among studies was indicated ( $I^2 = 0\%$ ,  $p=0.580$ ) (Figure 3,  
9  
10  
11 Table 1). Two studies reported the association between T-455C polymorphism and  
12  
13 MI risk, and the pooled result suggested a borderline significant association (pooled  
14  
15 OR=1.21, 95% CI 1.00-1.46).  
16  
17

### 18 19 **Meta-analysis of C-482T polymorphism**

20  
21 Four studies with 3070 individuals reported the association between C-482T  
22  
23 polymorphism and CHD risk. Only one study did not report whether C-482T  
24  
25 polymorphism was in Hardy-Weinberg equilibrium or not<sup>22</sup>. Two studies applied  
26  
27 real-time fluorescence quantitative PCR method<sup>9 16</sup>, one study used RFLP method<sup>22</sup>  
28  
29 and the other study adopted immobilized oligonucleotide probes array method<sup>19</sup>.  
30  
31  
32 Multivariable OR could be extracted from two studies<sup>16 18</sup> (Supplementary Table 3).  
33  
34 There was no significant association between C-482T polymorphism and CHD risk  
35  
36 (CT+TT vs. CC, pooled OR=1.06, 95% CI 0.92-1.22) (Figure 4, Table 1). No  
37  
38 significant heterogeneity was observed ( $I^2 = 0\%$ ,  $p=0.788$ ) (Figure 4, Table 1). Only  
39  
40 one study reported the association between C-482T polymorphism and MI risk  
41  
42 (OR=1.12, 95% CI 0.88-1.43)<sup>19</sup>.  
43  
44  
45  
46  
47

### 48 49 **Meta-analysis of C1100T polymorphism**

50  
51 Three studies comprising 4662 participants evaluated the association between  
52  
53 C1100T polymorphism and CHD risk. Two studies adopted immobilized  
54  
55 oligonucleotide probes array method<sup>19 24</sup> and one study used RFLP method<sup>22</sup>. No  
56  
57  
58  
59  
60

1  
2  
3  
4 significant association was found (CT+TT vs. CC, pooled OR=1.06, 95% CI  
5  
6 0.89-1.27) and no significant heterogeneity was observed ( $I^2 = 46.7\%$ ,  $p=0.153$ )  
7  
8 (Figure 5, Table 1). One study evaluated the association between C1100T  
9  
10 polymorphism and MI risk (OR=1.18, 95% CI 0.93-1.51)<sup>19</sup>.  
11  
12

### 13 14 **Publication bias**

15  
16 Begg's and Egger's tests suggested that no publication bias was found in our  
17  
18 meta-analyses.  
19

### 20 21 **Discussion**

22  
23 ApoC3 is a glycoprotein synthesized mainly in the liver and the intestinal, and  
24  
25 plays an essential role in regulating the serum triglyceride levels. Besides, it can  
26  
27 strongly regulate the levels of VLDL and small dense LDL which potentially  
28  
29 improves atherosclerosis<sup>31</sup>. Clinical research found that ApoC3 levels were predictor  
30  
31 of risk for development of CHD<sup>32-34</sup>. In the present study, twenty studies were  
32  
33 included and four polymorphisms of ApoC3 were evaluated, including C-482T,  
34  
35 T-455C, Sst I and C1100T polymorphisms. T-455C polymorphism was suggested to  
36  
37 be significantly associated with CHD risk, and 'C' allele increased CHD risk by 22  
38  
39 percent (CT+TT vs. CC, pooled OR=1.22, 95% CI 1.06-1.42). A borderline  
40  
41 significant association was observed between Sst I polymorphism and CHD risk.  
42  
43 While no evidence suggested significant association between C-482T and C1100T  
44  
45 polymorphisms and CHD risk. Subgroup analysis was applied for Sst I polymorphism,  
46  
47 and we found that Sst I polymorphism was significantly associated with MI risk.  
48  
49 Besides, Sst I polymorphism was significantly associated with CHD risk in Asian  
50  
51  
52  
53  
54  
55  
56  
57  
58  
59  
60

1  
2  
3  
4 population but not in Caucasian population, indicating that the effect of Sst I  
5  
6 polymorphism might be influenced by ethnicity. For retrospective studies, Sst I was  
7  
8 indicated to be significantly associated with CHD risk but this association was not  
9  
10 confirmed in prospective studies. So, the association between Sst I polymorphism and  
11  
12 CHD risk should be interpreted cautiously.  
13  
14

15  
16 The mechanism of Sst I polymorphism in CHD susceptibility may be multiple.  
17  
18 Sst I polymorphism is located in 3' untranslated region of the ApoC3 gene, and it is  
19  
20 possible that this polymorphism is in linkage disequilibrium with other functional  
21  
22 polymorphism in the nearby region, such as T-455C polymorphism<sup>10</sup>. Sst I  
23  
24 polymorphism might alter plasma lipid concentrations. Several studies showed S2  
25  
26 carriers have higher plasma total cholesterol, TG and LDL-C levels<sup>12 35 36</sup>, though  
27  
28 other studies did not demonstrate significant difference<sup>10 20 37</sup>. Besides, it has been  
29  
30 shown that S2 allele might significantly influence dyslipidemic state and  
31  
32 atherosclerosis severity when patients changed their diet from saturated fatty acids to  
33  
34 olive oil<sup>38</sup>. So, Sst I polymorphism plays an important role in modulating lipid levels  
35  
36 response to dietary changes.  
37  
38  
39  
40  
41  
42

43  
44 T-455C and C-482T polymorphisms both located in the 5' promoter region and  
45  
46 were in strong linkage disequilibrium with each other. These two polymorphisms  
47  
48 have been studied extensively because they could alter the nuclear transcript factors  
49  
50 which mediate the insulin response. Significant association between T-455C  
51  
52 polymorphism and risk of CHD was found under dominant model. However, it should  
53  
54 be noted that in the 4 studies evaluating T-455C polymorphism, only one study<sup>24</sup>  
55  
56  
57  
58  
59  
60

1  
2  
3 showed a significant association between T-455C polymorphism and CHD risk. So,  
4  
5 more studies with large sample size are warranted to clarify this issue. For C-482T  
6  
7  
8 polymorphism, no significant association with CHD risk was found.  
9

10  
11 Different mechanisms could be linked to this finding. In previous works, T-455C  
12  
13 polymorphism was associated with increased TG and ApoC3 levels<sup>24,39</sup>. Also, T-455C  
14  
15 polymorphism was demonstrated to be significantly associated with metabolic  
16  
17 syndrome<sup>39</sup>. Another study showed T-455C polymorphism could interfere with n-3  
18  
19 polyunsaturated fatty acids on ApoC3 concentrations<sup>7</sup>. Olivieri O *et al.* found that CC  
20  
21 homozygous carriers were poorly responsive to the ApoC3 lowering effects of n-3  
22  
23 polyunsaturated fatty acids<sup>7</sup>.  
24  
25  
26  
27

28  
29 The present meta-analysis has several strengths. First, this study was based on  
30  
31 guidelines for conducting and reporting systematic reviews and the methods were  
32  
33 rigorous. Second, we comprehensively evaluated the association between ApoC3  
34  
35 polymorphisms and CHD risk, and a total of four polymorphisms of ApoC3 were  
36  
37 assessed. Besides, no publication bias was observed, indicating the pooled results  
38  
39 might be unbiased.  
40  
41  
42

43  
44 The current analysis also has several limitations. First, most of the included studies  
45  
46 investigated Asian or Caucasian population, so the conclusions may not be true for  
47  
48 other ethnic groups. Second, significant heterogeneity was found and could not be  
49  
50 completely explained when assess some polymorphisms. Third, only Pubmed,  
51  
52 Embase and Cochrane library were searched for eligible articles. Finally, only articles  
53  
54 published in English were included.  
55  
56  
57  
58  
59  
60

1  
2  
3  
4  
5  
6  
7  
8  
9  
10  
11  
12  
13  
14  
15  
16  
17  
18  
19  
20  
21  
22  
23  
24  
25  
26  
27  
28  
29  
30  
31  
32  
33  
34  
35  
36  
37  
38  
39  
40  
41  
42  
43  
44  
45  
46  
47  
48  
49  
50  
51  
52  
53  
54  
55  
56  
57  
58  
59  
60

Some questions remain unanswered in the present study. Most of the studies did not report multivariable OR, so it is not clear whether ApoC3 polymorphisms could be an independent predictor of CHD risk or not. More studies are warranted to clarify this issue. Different genotyping assay methods were applied in the included studies, which might call for different results. And it should be noted that ApoC3 polymorphisms are non-modified risk factors, and little control methods over them were accessible. However, people in high risk groups (such as S2 carriers of Sst I polymorphism) might be advised to go for regular checkups to reduce the risk of adverse cardiac event. Detecting ApoC3 polymorphisms may help people be aware of the risk of CHD. With the current level of evidence, we cannot comment on the optimal genotyping assay method and the cost-effectiveness of detecting ApoC3 polymorphisms. Further research is needed to explore combination of variables associated with CHD risk to develop a predictive model with a high discriminative capacity.

In summary, ApoC3 Sst I and T-455C polymorphisms might be associated with CHD risk, while no evidence suggested significant association between C-482T and C1100T polymorphisms and CHD risk.

#### **Acknowledgements:**

The Corresponding Authors (Drs. Bin Lin and Yihua Wu) have the right to grant on behalf of all authors and does grant on behalf of all authors. Drs. Bin Lin and Yihua Wu contributed to conception, design of the study, and editing the manuscript; Drs. Yiwei Huang and Mingying Zhang contributed to data acquisition, analysis, and interpretation of the data. Dr. Jun Wang contributed to statistical analysis and editing



1  
2  
3  
4 the manuscript.

5  
6 **Data sharing statement:** No additional data are available.  
7

8  
9 We declare that we have no conflict of interest.  
10  
11  
12  
13  
14  
15  
16  
17  
18  
19  
20  
21  
22  
23  
24  
25  
26  
27  
28  
29  
30  
31  
32  
33  
34  
35  
36  
37  
38  
39  
40  
41  
42  
43  
44  
45  
46  
47  
48  
49  
50  
51  
52  
53  
54  
55  
56  
57  
58  
59  
60

**Reference:**

1. Ross R. Atherosclerosis--an inflammatory disease. *N Engl J Med* 1999;340:115-26.
2. Jensen MK, Rimm EB, Rader D, *et al.* S447X variant of the lipoprotein lipase gene, lipids, and risk of coronary heart disease in 3 prospective cohort studies. *Am Heart J* 2009;157:384-90.
3. Nordestgaard BG, Benn M, Schnohr P, *et al.* Nonfasting triglycerides and risk of myocardial infarction, ischemic heart disease, and death in men and women. *JAMA* 2007;298:299-308.
4. Windler E, Havel RJ. Inhibitory effects of C apolipoproteins from rats and humans on the uptake of triglyceride-rich lipoproteins and their remnants by the perfused rat liver. *J Lipid Res* 1985;26:556-65.
5. Jong MC, Hofker MH, Havekes LM. Role of ApoCs in lipoprotein metabolism: functional differences between ApoC1, ApoC2, and ApoC3. *Arterioscler Thromb Vasc Biol* 1999;19:472-84.
6. Hodis HN, Mack WJ, Azen SP, *et al.* Triglyceride- and cholesterol-rich lipoproteins have a differential effect on mild/moderate and severe lesion progression as assessed by quantitative coronary angiography in a controlled trial of lovastatin. *Circulation* 1994;90:42-9.
7. Olivieri O, Martinelli N, Sandri M, *et al.* Apolipoprotein C-III, n-3 polyunsaturated fatty acids, and "insulin-resistant" T-455C APOC3 gene polymorphism in heart disease patients: example of gene-diet interaction. *Clin Chem* 2005;51:360-7.
8. Tilly P, Sass C, Vincent-Viry M, *et al.* Biological and genetic determinants of serum apoC-III concentration: reference limits from the Stanislas Cohort. *J Lipid Res* 2003;44:430-6.
9. Yu J, Huang J, Liang Y, *et al.* Lack of association between apolipoprotein C3 gene polymorphisms and risk of coronary heart disease in a Han population in East China. *Lipids Health Dis* 2011;10:200.
10. Sediri Y, Kallel A, Feki M, *et al.* Association of a DNA polymorphism of the apolipoprotein AI-CIII-AIV gene cluster with myocardial infarction in a Tunisian population. *Eur J Intern Med* 2011;22:407-11.
11. Bhanushali AA, Das BR. Influence of genetic variants in the apolipoprotein A5 and C3 gene on lipids, lipoproteins, and its association with coronary artery disease in Indians. *J Community Genet* 2010;1:139-48.
12. Abd El-Aziz TA, Mohamed RH, Hashem RM. Association of lipoprotein lipase and apolipoprotein C-III genes polymorphism with acute myocardial infarction in diabetic patients. *Mol Cell Biochem* 2011;354:141-50.
13. Moher D, Liberati A, Tetzlaff J, *et al.* Preferred reporting items for systematic reviews and meta-analyses: the PRISMA statement. *Ann Intern Med* 2009;151:264-9, W64.
14. Stang A. Critical evaluation of the Newcastle-Ottawa scale for the assessment of the quality of nonrandomized studies in meta-analyses. *Eur J Epidemiol* 2010;25:603-5.
15. AshokKumar M, Subhashini NG, SaiBabu R, *et al.* Genetic variants on apolipoprotein gene cluster influence triglycerides with a risk of coronary artery disease among Indians. *Mol Biol Rep* 2010;37:521-7.
16. Muendlein A, Saely CH, Marte T, *et al.* Synergistic effects of the apolipoprotein E epsilon3/epsilon2/epsilon4, the cholesteryl ester transfer protein TaqIB, and the apolipoprotein C3 -482 C>T polymorphisms on their association with coronary artery disease. *Atherosclerosis* 2008;199:179-86.
17. Martinelli N, Trabetti E, Bassi A, *et al.* The -1131 T>C and S19W APOA5 gene polymorphisms

- are associated with high levels of triglycerides and apolipoprotein C-III, but not with coronary artery disease: an angiographic study. *Atherosclerosis* 2007;191:409-17.
18. Dallongeville J, Cottel D, Montaye M, *et al.* Impact of APOA5/A4/C3 genetic polymorphisms on lipid variables and cardiovascular disease risk in French men. *Int J Cardiol* 2006;106:152-6.
  19. Tobin MD, Braund PS, Burton PR, *et al.* Genotypes and haplotypes predisposing to myocardial infarction: a multilocus case-control study. *Eur Heart J* 2004;25:459-67.
  20. Liu S, Song Y, Hu FB, *et al.* A prospective study of the APOA1 XmnI and APOC3 SstI polymorphisms in the APOA1/C3/A4 gene cluster and risk of incident myocardial infarction in men. *Atherosclerosis* 2004;177:119-26.
  21. Chhabra S, Narang R, Lakshmy R, *et al.* Apolipoprotein C3 SstI polymorphism in the risk assessment of CAD. *Mol Cell Biochem* 2004;259:59-66.
  22. Wong WM, Hawe E, Li LK, *et al.* Apolipoprotein AIV gene variant S347 is associated with increased risk of coronary heart disease and lower plasma apolipoprotein AIV levels. *Circ Res* 2003;92:969-75.
  23. Izar MC, Fonseca FA, Ihara SS, *et al.* Risk Factors, biochemical markers, and genetic polymorphisms in early coronary artery disease. *Arq Bras Cardiol* 2003;80:379-95.
  24. Olivieri O, Stranieri C, Bassi A, *et al.* ApoC-III gene polymorphisms and risk of coronary artery disease. *J Lipid Res* 2002;43:1450-7.
  25. Russo GT, Meigs JB, Cupples LA, *et al.* Association of the Sst-I polymorphism at the APOC3 gene locus with variations in lipid levels, lipoprotein subclass profiles and coronary heart disease risk: the Framingham offspring study. *Atherosclerosis* 2001;158:173-81.
  26. Wick U, Witt E, Engel W. Restriction fragment length polymorphisms at the apoprotein genes AI, CIII and B-100 and in the 5' flanking region of the insulin gene as possible markers of coronary heart disease. *Clin Genet* 1995;47:184-90.
  27. Vavatsi NA, Kouidou SA, Geleris PN, *et al.* Increased frequency of the rare PstI allele (P2) in a population of CAD patients in northern Greece. *Clin Genet* 1995;47:22-6.
  28. Rigoli L, Raimondo G, Di Benedetto A, *et al.* Apolipoprotein AI-CIII-AIV genetic polymorphisms and coronary heart disease in type 2 diabetes mellitus. *Acta Diabetol* 1995;32:251-6.
  29. Miettinen HE, Korpela K, Hamalainen L, *et al.* Polymorphisms of the apolipoprotein and angiotensin converting enzyme genes in young North Karelian patients with coronary heart disease. *Hum Genet* 1994;94:189-92.
  30. Kee F, Amouyel P, Fumeron F, *et al.* Lack of association between genetic variations of apo A-I-C-III-A-IV gene cluster and myocardial infarction in a sample of European male: ECTIM study. *Atherosclerosis* 1999;145:187-95.
  31. Sacks FM, Zheng C, Cohn JS. Complexities of plasma apolipoprotein C-III metabolism. *J Lipid Res* 2011;52:1067-70.
  32. Onat A, Erginel-Unaltuna N, Coban N, *et al.* APOC3 -482C>T polymorphism, circulating apolipoprotein C-III and smoking: interrelation and roles in predicting type-2 diabetes and coronary disease. *Clin Biochem* 2011;44:391-6.
  33. Olivieri O, Martinelli N, Girelli D, *et al.* Apolipoprotein C-III predicts cardiovascular mortality in severe coronary artery disease and is associated with an enhanced plasma thrombin generation. *J Thromb Haemost* 2010;8:463-71.
  34. Sacks FM, Alaupovic P, Moye LA, *et al.* VLDL, apolipoproteins B, CIII, and E, and risk of

- 1  
2  
3 recurrent coronary events in the Cholesterol and Recurrent Events (CARE) trial. *Circulation*  
4 2000;102:1886-92.  
5  
6 35. Arai H, Yamamoto A, Matsuzawa Y, *et al.* Polymorphisms in four genes related to triglyceride  
7 and HDL-cholesterol levels in the general Japanese population in 2000. *J Atheroscler*  
8 *Thromb* 2005;12:240-50.  
9  
10 36. Buzza M, Fripp Y, Mitchell RJ. Apolipoprotein AI and CIII gene polymorphisms and their  
11 association with lipid levels in Italian, Greek and Anglo-Irish populations of Australia. *Ann*  
12 *Hum Biol* 2001;28:481-90.  
13  
14 37. Corella D, Guillen M, Saiz C, *et al.* Associations of LPL and APOC3 gene polymorphisms on  
15 plasma lipids in a Mediterranean population: interaction with tobacco smoking and the  
16 APOE locus. *J Lipid Res* 2002;43:416-27.  
17  
18 38. Perez-Martinez P, Gomez P, Paz E, *et al.* Interaction between smoking and the SstI polymorphism  
19 of the apo C-III gene determines plasma lipid response to diet. *Nutr Metab Cardiovasc Dis*  
20 2001;11:237-43.  
21  
22 39. Olivieri O, Bassi A, Stranieri C, *et al.* Apolipoprotein C-III, metabolic syndrome, and risk of  
23 coronary artery disease. *J Lipid Res* 2003;44:2374-81.  
24  
25  
26  
27  
28  
29  
30  
31  
32  
33  
34  
35  
36  
37  
38  
39  
40  
41  
42  
43  
44  
45  
46  
47  
48  
49  
50  
51  
52  
53  
54  
55  
56  
57  
58  
59  
60

**Table 1** Meta-analysis results of Sst I, T-455C, C-482T, C1100T polymorphisms

| Polymorphism | No. of studies | No. of participants | Comparison         | OR (95% CI)      | Heterogeneity      |       |
|--------------|----------------|---------------------|--------------------|------------------|--------------------|-------|
|              |                |                     |                    |                  | I <sup>2</sup> (%) | P     |
| Sst I        | 15             | 11539               | S1S2+S2S2 vs. S1S1 | 1.19 (1.00-1.42) | 48.9               | 0.017 |
| T-455C       | 4              | 3378                | TC+CC vs. TT       | 1.22 (1.06-1.42) | 0                  | 0.580 |
| C-482T       | 4              | 3070                | CT+TT vs. CC       | 1.06 (0.92-1.22) | 0                  | 0.788 |
| C1100T       | 3              | 4662                | CT+TT vs. CC       | 1.06 (0.89-1.27) | 46.7               | 0.153 |

**Table 2** Subgroup analysis of Sst I polymorphism

| Groups       |               | OR (95% CI)      | Heterogeneity      |       |
|--------------|---------------|------------------|--------------------|-------|
|              |               |                  | I <sup>2</sup> (%) | P     |
| Ethnicity    | Caucasian     | 1.14 (0.92-1.41) | 54.2               | 0.013 |
|              | Asian         | 1.35 (1.08-1.69) | 0                  | 0.427 |
| Study design | Retrospective | 1.30 (1.04-1.61) | 39.0               | 0.098 |
|              | Prospective   | 0.98 (0.75-1.28) | 52.3               | 0.098 |
| Phenotype    | CHD           | 1.09 (0.87-1.35) | 46.0               | 0.047 |
|              | MI            | 1.42 (1.06-1.91) | 52.3               | 0.099 |

**Figure legends**

**Figure 1.** Flow diagram of study selection process.

**Figure 2.** Association between Sst I polymorphism and CHD risk.

1  
2  
3  
4  
5  
6  
7 **Figure 3.** Association between T-455C polymorphism and CHD risk.  
8

9 **Figure 4.** Association between C-482T polymorphism and CHD risk.  
10

11 **Figure 5.** Association between C1100T polymorphism and CHD risk.  
12  
13  
14  
15  
16

17 **Supplementary file.**  
18

19 **Supplementary Table 1** Characteristics of the included studies  
20

21 **Supplementary Table 2** Quality assessment of the included studies  
22

23 **Supplementary Table 3** Studies reporting multivariable OR  
24  
25

26 **Checklist** PRISMA checklist  
27  
28  
29  
30  
31  
32  
33  
34  
35  
36  
37  
38  
39  
40  
41  
42  
43  
44  
45  
46  
47  
48  
49

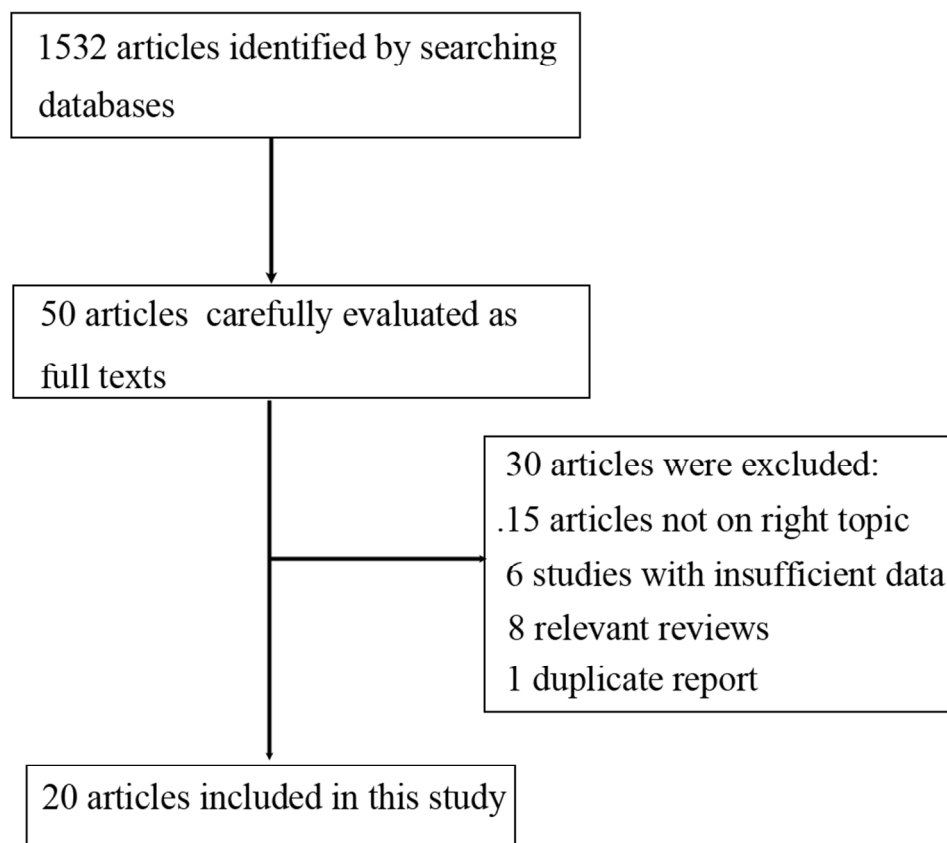

Figure 1. Flow diagram of study selection process.  
88x88mm (300 x 300 DPI)



Figure 2. Association between Sst I polymorphism and CHD risk.  
127x102mm (300 x 300 DPI)



1  
2  
3  
4  
5  
6  
7  
8  
9  
10  
11  
12  
13  
14  
15  
16  
17  
18  
19  
20  
21  
22  
23  
24  
25  
26  
27  
28  
29  
30  
31  
32  
33  
34  
35  
36  
37  
38  
39  
40  
41  
42  
43  
44  
45  
46  
47  
48  
49  
50  
51  
52  
53  
54  
55  
56  
57  
58  
59  
60

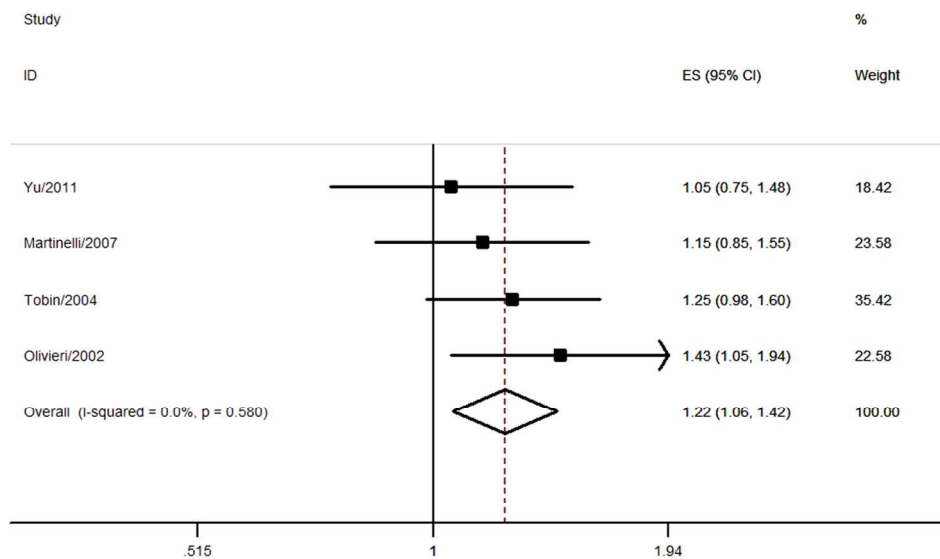

Figure 3. Association between T-455C polymorphism and CHD risk.  
127x84mm (300 x 300 DPI)

Review only

1  
2  
3  
4  
5  
6  
7  
8  
9  
10  
11  
12  
13  
14  
15  
16  
17  
18  
19  
20  
21  
22  
23  
24  
25  
26  
27  
28  
29  
30  
31  
32  
33  
34  
35  
36  
37  
38  
39  
40  
41  
42  
43  
44  
45  
46  
47  
48  
49  
50  
51  
52  
53  
54  
55  
56  
57  
58  
59  
60

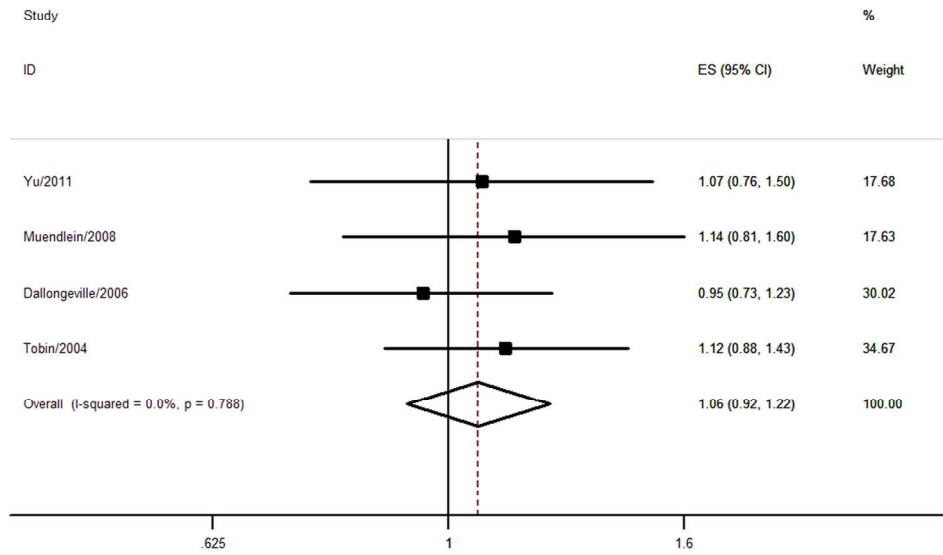

Figure 4. Association between C-482T polymorphism and CHD risk.  
127x84mm (300 x 300 DPI)

Review only

1  
2  
3  
4  
5  
6  
7  
8  
9  
10  
11  
12  
13  
14  
15  
16  
17  
18  
19  
20  
21  
22  
23  
24  
25  
26  
27  
28  
29  
30  
31  
32  
33  
34  
35  
36  
37  
38  
39  
40  
41  
42  
43  
44  
45  
46  
47  
48  
49  
50  
51  
52  
53  
54  
55  
56  
57  
58  
59  
60

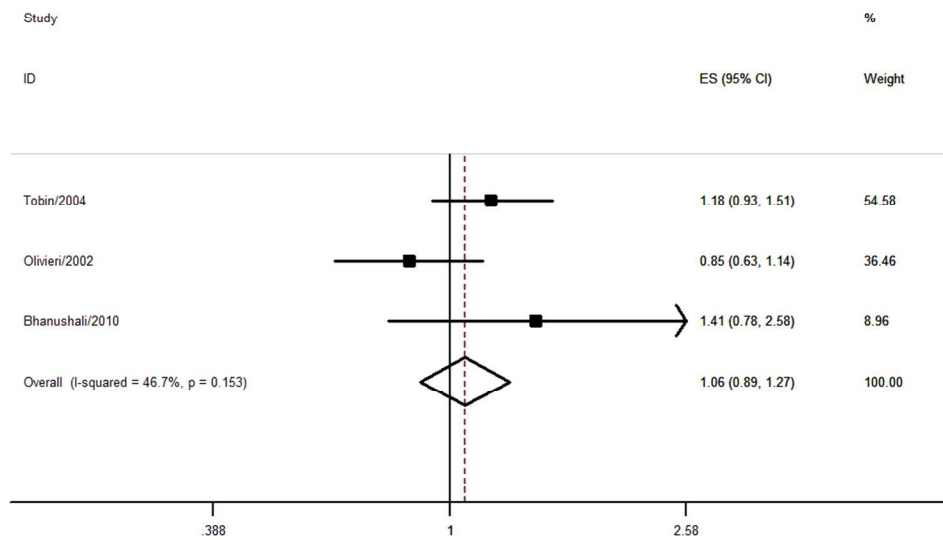

Figure 5. Association between C1100T polymorphism and CHD risk.  
127x82mm (300 x 300 DPI)

Review only

1  
2  
3  
4  
5  
6  
7  
8  
9  
10  
11  
12  
13  
14  
15  
16  
17  
18  
19  
20  
21  
22  
23  
24  
25  
26  
27  
28  
29  
30  
31  
32  
33  
34  
35  
36  
37  
38  
39  
40  
41  
42  
43  
44  
45  
46  
47  
48  
49

**Supplementary Table 1** Characteristics of the included studies

| Study and Publication year     | Country | Study design | Sample size (cases/controls) | Sex (M/F)                          | Mean Age (years)                | Phenotype | Mutation or polymorphisms | Cases    |          |          | Controls |            |          | HWE | Method                                  |
|--------------------------------|---------|--------------|------------------------------|------------------------------------|---------------------------------|-----------|---------------------------|----------|----------|----------|----------|------------|----------|-----|-----------------------------------------|
|                                |         |              |                              |                                    |                                 |           |                           | aa       | ab*      | bb       | aa       | ab         | bb       |     |                                         |
| Yu/2011 <sup>9</sup>           | China   | Case-control | 611(286/325)                 | Cases: 214/72<br>Controls: 172/153 | Cases: 56.3<br>Controls: 55.79  | CHD       | T-455C<br><br>C-482T      | 90<br>89 | 13<br>13 | 47<br>48 | 11<br>11 | 157<br>159 | 54<br>52 | Yes | Real-time fluorescence quantitative PCR |
| Sediri/2011 <sup>10</sup>      | Tunisia | Case-control | 687(326/361)                 | Cases: 326/0<br>Controls: 361/0    | Cases: 53.8<br>Controls: 51.1   | MI        | Sst I                     | 26<br>6  | 53       | 7        | 31<br>5  | 45         | 1        | Yes | PCR-RFLP                                |
| Abd El-Aziz/2011 <sup>12</sup> | Egypt   | Case-control | 300(200/100)                 | Cases: 67/33<br>Controls: 32/18    | Cases: 52.9<br>Controls: 50.7   | MI        | Sst I                     | 15<br>0  | 42       | 8        | 70       | 10         | 20       | Yes | PCR-RFLP                                |
| AshokKumar/2010 <sup>15</sup>  | India   | Case-control | 832(416/416)                 | Cases: 322/94<br>Controls: 315/101 | Cases: 53.23<br>Controls: 53.59 | CHD       | Sst I                     | 18<br>9  | 19<br>3  | 34       | 21<br>8  | 176        | 22       | Yes | PCR-RFLP                                |

1  
2  
3  
4  
5  
6  
7  
8  
9  
10  
11  
12  
13  
14  
15  
16  
17  
18  
19  
20  
21  
22  
23  
24  
25  
26  
27  
28  
29  
30  
31  
32  
33  
34  
35  
36  
37  
38  
39  
40  
41  
42  
43  
44  
45  
46  
47  
48  
49

|                                  |         |               |               |                                     |                                 |            |         |         |         |         |           |           |    |     |                                          |
|----------------------------------|---------|---------------|---------------|-------------------------------------|---------------------------------|------------|---------|---------|---------|---------|-----------|-----------|----|-----|------------------------------------------|
| Bhanushali/2010 <sup>11</sup>    | India   | Case-control  | 240(50/190)   | Cases: 82/8<br>Controls: 146/44     | Cases: 47<br>Controls: 48       | CHD        | Sst I   | -       | -       | -       | -         | -         | -  | Yes | PCR-RFLP                                 |
| Muendlein/2008 <sup>16</sup>     | Austria | Cross-section | 557(332/225)  | Cases: 264/68<br>Controls: 123/102  | Cases: 62.5<br>Controls: 61.5   | CHD        | C-482T  | 16<br>2 | 14<br>3 | 27<br>7 | 11<br>7   | 87<br>21  | 21 | Yes | Real-time fluorescence quantitative PCR  |
| Martinelli/2007 <sup>17</sup>    | Italy   | Case-control  | 913(669/244)  | Cases: 544/125<br>Controls: 168/76  | Cases: 60.7<br>Controls: 58.7   | CHD        | T-455C  | 24<br>4 | 30<br>0 | 12<br>5 | 97<br>118 | 29        | 29 | Yes | Immobilized oligonucleotide probes array |
| Dallongeville/2006 <sup>18</sup> | France  | Case-control  | 917(442/475)  | Cases: 442/0<br>Controls: 475/0     | Cases: 35-64<br>Controls: 35-64 | CHD and MI | C-482T  | 23<br>7 | 15<br>5 | 35<br>5 | 25<br>5   | 185<br>31 | 31 | Yes | PCR-RFLP                                 |
| Tobin/2004 <sup>9</sup>          | UK      | Case-control  | 1054(549/505) | Cases: 372/177<br>Controls: 313/192 | Cases: 61.9<br>Controls: 58.6   | MI         | C-482T  | 29<br>1 | 23<br>3 | 23<br>3 | 28<br>3   | 193       | 29 | Yes | Immobilized oligonucleotide probes array |
|                                  |         |               |               |                                     |                                 |            | T-455C  | 21<br>1 | 28<br>4 | 52<br>4 | 21<br>4   | 229       | 62 | Yes |                                          |
|                                  |         |               |               |                                     |                                 |            | C1100 T | 29<br>8 | 20<br>9 | 40<br>6 | 29<br>6   | 172       | 37 | Yes |                                          |

1  
2  
3  
4  
5  
6  
7  
8  
9  
10  
11  
12  
13  
14  
15  
16  
17  
18  
19  
20  
21  
22  
23  
24  
25  
26  
27  
28  
29  
30  
31  
32  
33  
34  
35  
36  
37  
38  
39  
40  
41  
42  
43  
44  
45  
46  
47  
48  
49

|                             |        |                     |                |                                    |                                   |     |                       |         |         |         |         |     |    |     |                                          |
|-----------------------------|--------|---------------------|----------------|------------------------------------|-----------------------------------|-----|-----------------------|---------|---------|---------|---------|-----|----|-----|------------------------------------------|
| Liu/2004 <sup>20</sup>      | USA    | Nested case-control | 758(385/373)   | Cases: 385/0<br>Controls: 373/0    | Cases: 60<br>Controls: 59         | MI  | Sst I                 | 29<br>5 | 77      | 6       | 29<br>7 | 60  | 4  | Yes | PCR-RFLP                                 |
| Chhabra/2004 <sup>21</sup>  | India  | Case-control        | 309(158/151)   | Cases: 139/19<br>Controls: 139/12  | Cases: 53.25<br>Controls: 52.45   | CHD | Sst I                 | 66      | 76      | 16      | 71      | 66  | 14 | Yes | PCR-RFLP                                 |
| Wong/2003 <sup>22</sup>     | UK     | Cohort              | 2808(187/2621) | Cases: 187/0<br>Controls: 2621/0   | Cases: 56.67<br>Controls: 56.01   | CHD | C1100T, C-428T, Sst I | -       | -       | -       | -       | -   | -  | -   | PCR-RFLP                                 |
| Izar/2003 <sup>23</sup>     | Brazil | Case-control        | 224(112/112)   | Cases: 65/47<br>Controls: 66/46    | Cases: 46<br>Controls: 45(Median) | CHD | Sst I                 | 81      | 23      | 3       | 71      | 32  | 1  | Yes | PCR-RFLP                                 |
| Olivieri/2002 <sup>24</sup> | Italy  | Cross-section       | 800(549/251)   | Cases: 449/100<br>Controls: 168/83 | Cases: 60.4<br>Controls: 57.6     | CHD | T-455C                | 19<br>4 | 25<br>3 | 10<br>2 | 11<br>0 | 118 | 23 | Yes | Immobilized oligonucleotide probes array |
|                             |        |                     |                |                                    |                                   |     | C1100T                | 29<br>8 | 20<br>5 | 46<br>6 | 12<br>6 | 108 | 17 | Yes |                                          |
|                             |        |                     |                |                                    |                                   |     | Sst I                 | 45<br>2 | 97      | 0       | 21<br>4 | 37  | 0  | Yes |                                          |

|                              |             |                  |                    |                                                |                                     |     |       |         |         |   |         |     |   |     |          |
|------------------------------|-------------|------------------|--------------------|------------------------------------------------|-------------------------------------|-----|-------|---------|---------|---|---------|-----|---|-----|----------|
| Russo/2001 <sup>25</sup>     | USA         | Cohort           | 2485(20<br>2/2283) | Cases:<br>146/56<br>Controls:<br>1133/115<br>0 | -                                   | CHD | Sst I | -       | -       | - | -       | -   | - | Yes | PCR-RFLP |
| Kee/1999 <sup>30</sup>       | UK          | Case-co<br>ntrol | 1375(76<br>1/614)  | Cases:<br>761/0<br>Controls:<br>614/0          | -                                   | MI  | Sst I | 50<br>1 | 11<br>2 | 1 | 64<br>5 | 113 | 3 | Yes | PCR-RFLP |
| Wick/1995 <sup>26</sup>      | Germa<br>ny | Case-co<br>ntrol | 313(212/<br>101)   | -                                              | -                                   | CHD | Sst I | 17<br>0 | 42      | 0 | 85      | 16  | 0 | Yes | PCR-RFLP |
| Vavatsi/1995 <sup>27</sup>   | Greece      | Case-co<br>ntrol | 149(95/5<br>4)     | Cases:<br>85/10<br>Controls:<br>46/9           | Cases:<br>51<br>Controls:<br>50     | CHD | Sst I | 69      | 20      | 0 | 36      | 12  | 2 | Yes | PCR-RFLP |
| Rigoli/1995 <sup>28</sup>    | Italy       | Case-co<br>ntrol | 124(62/6<br>2)     | Cases:<br>43/19<br>Controls:<br>42/20          | Cases:<br>58.2<br>Controls:<br>57.6 | CHD | Sst I | 41      | 21      | 0 | 52      | 10  | 0 | Yes | PCR-RFLP |
| Miettinen/1994 <sup>29</sup> | Finlan<br>d | Case-co<br>ntrol | 132(82/5<br>0)     | Cases:<br>78/4<br>Controls:<br>42/8            | Cases:<br>40.8<br>Controls:<br>38.7 | CHD | Sst I | 62      | 19      | 1 | 37      | 12  | 1 | Yes | PCR-RFLP |

MI: myocardial infarction; AMI: acute myocardial infarction; CHD: coronary heart disease; HWE: Hardy-Weinberg Equilibrium; PCR: polymerase chain reaction; RFLP: restriction fragment length polymorphism

-: not reported.

**Supplementary Table 2** Quality assessment of the included studies

| Study                             | Q1 | Q2 | Q3 | Q4 | Q5 | Q6 | Q7 | Q8 | Quality |
|-----------------------------------|----|----|----|----|----|----|----|----|---------|
| Yu/2011 <sup>9</sup>              | 1  | 1  | 0  | 0  | 1  | 1  | 1  | 1  | 6       |
| Sediri/2011 <sup>10</sup>         | 0  | 1  | 0  | 1  | 1  | 1  | 1  | 1  | 6       |
| Abd<br>El-Aziz/2011 <sup>12</sup> | 0  | 0  | 1  | 1  | 2  | 1  | 1  | 1  | 7       |
| AshokKumar/2010 <sup>15</sup>     | 1  | 0  | 1  | 1  | 2  | 1  | 1  | 1  | 8       |
| Bhanushali/2010 <sup>11</sup>     | 1  | 0  | 0  | 1  | 1  | 1  | 1  | 1  | 6       |
| Muendlein/2008 <sup>16</sup>      | 1  | 1  | 0  | 0  | 1  | 1  | 1  | 1  | 7       |
| Martinelli/2007 <sup>17</sup>     | 1  | 1  | 0  | 1  | 1  | 1  | 1  | 1  | 7       |
| Dallongeville/2006 <sup>18</sup>  | 1  | 0  | 0  | 0  | 1  | 1  | 1  | 1  | 5       |
| Tobin/2004 <sup>19</sup>          | 1  | 1  | 1  | 1  | 1  | 1  | 1  | 1  | 8       |
| Liu/2004 <sup>20</sup>            | 0  | 1  | 1  | 1  | 1  | 1  | 1  | 1  | 7       |
| Chhabra/2004 <sup>21</sup>        | 1  | 0  | 0  | 1  | 1  | 1  | 1  | 1  | 6       |
| Wong/2003 <sup>22</sup>           | 1  | 1  | 1  | 0  | 1  | 1  | 1  | 1  | 7       |
| Izar/2003 <sup>23</sup>           | 1  | 1  | 1  | 1  | 2  | 1  | 1  | 1  | 9       |
| Olivieri/2002 <sup>24</sup>       | 1  | 0  | 0  | 1  | 0  | 1  | 1  | 1  | 5       |
| Russo/2001 <sup>25</sup>          | 1  | 1  | 1  | 1  | 1  | 1  | 1  | 0  | 7       |
| Kee/1999 <sup>30</sup>            | 1  | 1  | 0  | 1  | 1  | 1  | 1  | 0  | 6       |
| Wick/1995 <sup>26</sup>           | 1  | 0  | 0  | 1  | 0  | 1  | 1  | 1  | 5       |
| Vavatsi/1995 <sup>27</sup>        | 1  | 0  | 0  | 1  | 1  | 1  | 1  | 1  | 6       |
| Rigoli/1995 <sup>28</sup>         | 1  | 0  | 0  | 1  | 2  | 1  | 1  | 1  | 7       |
| Miettinen/199 <sup>29</sup>       | 1  | 1  | 1  | 1  | 1  | 1  | 1  | 1  | 8       |



**For case-control and cross-sectional studies**

Q1: Is the case definition adequate?

- a) yes, with independent validation  b) yes, eg record linkage or based on self-reports c) no description

Q2: Representativeness of the cases

- a) consecutive or obviously representative series of cases  b) potential for selection biases or not stated

Q3: Selection of Controls

- a) community controls  b) hospital controls c) no description

Q4: Definition of Controls

- a) no history of disease (endpoint)  b) no description of source

Q5: Comparability of cases and controls on the basis of the design or analysis

- a) study controls for age  b) study controls for any additional factor

Q6: Ascertainment of exposure

- a) secure record  b) structured interview where blind to case/control status   
c) interview not blinded to case/control status d) written self-report or medical record only  
e) no description

Q7: Same method of ascertainment for cases and controls

- a) yes  b) no

Q8: Non-Response rate

- a) same rate for both groups  b) non respondents described c) rate different and no designation

**For cohort studies**

Q1: Representativeness of the exposed cohort

- a) truly representative of the average population in the community  b) somewhat representative of the average population in the community  
c) selected group of users d) no description of the derivation of the cohort

Q2: Selection of the non exposed cohort

- a) drawn from the same community as the exposed cohort  b) drawn from a different source

1  
2  
3  
4  
5  
6  
7  
8  
9  
10  
11  
12  
13  
14  
15  
16  
17  
18  
19  
20  
21  
22  
23  
24  
25  
26  
27  
28  
29  
30  
31  
32  
33  
34  
35  
36  
37  
38  
39  
40  
41  
42  
43  
44  
45  
46  
47  
48  
49

- c) no description of the derivation of the non-exposed cohort
- Q3: Ascertainment of exposure
  - a) secure record
  - b) structured interview
  - c) written self-report
  - d) no description
- Q4: Demonstration that outcome of interest was not present at start of study
  - a) yes
  - b) no
- Q5: Comparability of cohorts on the basis of the design or analysis
  - a) study controls for age
  - b) study controls for any additional factor Outcome
- Q6: Assessment of outcome
  - a) independent blind assessment
  - b) record linkage
  - c) self-report
  - d) no description
- Q7: Was follow-up long enough for outcomes to occur
  - a) yes
  - b) no
- Q8: Adequacy of follow up of cohorts
  - a) complete follow up - all subjects accounted for
  - b) subjects lost to follow up unlikely to introduce bias - small number lost > 70 % follow up, or description provided of those lost
  - c) follow up rate < 70% and no description of those lost
  - d) no statement

**Supplementary Table 3** Studies with multivariable OR

| Study                         | Polymorphism | Univariate OR (95% CI) | Multivariable OR (95% CI) | Adjusted factors                               |
|-------------------------------|--------------|------------------------|---------------------------|------------------------------------------------|
| Sediri/2011 <sup>10</sup>     | Sst I        | 1.54 (1.02-2.34)       | 2.02 (1.11-3.67)          | age, diabetes, dyslipidemia, BMI and smoking   |
| Muendlein/2008 <sup>16</sup>  | C-482T       | 1.14 (0.81-1.60)       | 1.18 (0.8-1.75)           | age, sex, T2DM, BMI, hypertension, and smoking |
| Martinelli/2007 <sup>17</sup> | T-455C       | 1.15 (0.85-1.55)       | 1.82 (1.05-3.18)          | age, sex, smoke, hypertension, diabetes, BMI,  |

|                                  |        |                  |                  |                                                                                                                                                                              |
|----------------------------------|--------|------------------|------------------|------------------------------------------------------------------------------------------------------------------------------------------------------------------------------|
|                                  |        |                  |                  | creatinine, LDL-cholesterol, HDL-cholesterol, TG, ApoC-III and hs-CRP                                                                                                        |
| Dallongeville/2006 <sup>18</sup> | C-482T | 0.95 (0.73-1.23) | 0.91 (0.69-1.22) | age                                                                                                                                                                          |
| Liu/2004 <sup>20</sup>           | Sst I  | 1.13 (0.80-1.61) | 1.25 (0.74–2.10) | age, cigarette smoking, BMI, alcohol intake, physical activity, history of diabetes mellitus, history of high cholesterol, history of hypertension, and use of multivitamins |
| Wong/2003 <sup>22</sup>          | Sst I  | 0.72 (0.45-1.15) | 0.70 (0.44-1.12) | age and practice and triglyceride levels                                                                                                                                     |
| Olivieri/2002 <sup>24</sup>      | Sst I  | 1.24 (0.82-1.87) | 0.97 (0.59–1.59) | age, gender, smoking status, presence of diabetes and hypertension, cholesterol, triglycerides, apoA-I, and apoB.                                                            |

BMI: body mass index; T2DM: type 2 diabetes mellitus; LDL: low density lipoprotein; HDL: high density lipoprotein; TG: triglyceride; hs-CRP: high sensitivity C-reaction protein.

1  
2  
3  
4  
5  
6  
7  
8  
9  
10  
11  
12  
13  
14  
15  
16  
17  
18  
19  
20  
21  
22  
23  
24  
25  
26  
27  
28  
29  
30  
31  
32  
33  
34  
35  
36  
37  
38  
39  
40  
41  
42  
43  
44  
45  
46  
47  
48  
49

Checklist PRISMA checklist

| Section/topic             | # | Checklist item                                                                                                                                                                                                                                                                                              | Reported on page # |
|---------------------------|---|-------------------------------------------------------------------------------------------------------------------------------------------------------------------------------------------------------------------------------------------------------------------------------------------------------------|--------------------|
| <b>TITLE</b>              |   |                                                                                                                                                                                                                                                                                                             |                    |
| Title                     | 1 | Identify the report as a systematic review, meta-analysis, or both.                                                                                                                                                                                                                                         | 1                  |
| <b>ABSTRACT</b>           |   |                                                                                                                                                                                                                                                                                                             |                    |
| Structured summary        | 2 | Provide a structured summary including, as applicable: background; objectives; data sources; study eligibility criteria, participants, and interventions; study appraisal and synthesis methods; results; limitations; conclusions and implications of key findings; systematic review registration number. | 2-3                |
| <b>INTRODUCTION</b>       |   |                                                                                                                                                                                                                                                                                                             |                    |
| Rationale                 | 3 | Describe the rationale for the review in the context of what is already known.                                                                                                                                                                                                                              | 4                  |
| Objectives                | 4 | Provide an explicit statement of questions being addressed with reference to participants, interventions, comparisons, outcomes, and study design (PICOS).                                                                                                                                                  | 4                  |
| <b>METHODS</b>            |   |                                                                                                                                                                                                                                                                                                             |                    |
| Protocol and registration | 5 | Indicate if a review protocol exists, if and where it can be accessed (e.g., Web address), and, if available, provide registration information including registration number.                                                                                                                               |                    |
| Eligibility criteria      | 6 | Specify study characteristics (e.g., PICOS, length of follow-up) and report characteristics (e.g., years considered, language, publication status) used as criteria for eligibility, giving rationale.                                                                                                      | 5                  |
| Information sources       | 7 | Describe all information sources (e.g., databases with dates of coverage, contact with study authors to identify additional studies) in the search and date last searched.                                                                                                                                  | 4                  |

|                                    |    |                                                                                                                                                                                                                        |     |
|------------------------------------|----|------------------------------------------------------------------------------------------------------------------------------------------------------------------------------------------------------------------------|-----|
| Search                             | 8  | Present full electronic search strategy for at least one database, including any limits used, such that it could be repeated.                                                                                          | 4-5 |
| Study selection                    | 9  | State the process for selecting studies (i.e., screening, eligibility, included in systematic review, and, if applicable, included in the meta-analysis).                                                              | 5   |
| Data collection process            | 10 | Describe method of data extraction from reports (e.g., piloted forms, independently, in duplicate) and any processes for obtaining and confirming data from investigators.                                             | 5   |
| Data items                         | 11 | List and define all variables for which data were sought (e.g., PICOS, funding sources) and any assumptions and simplifications made.                                                                                  | 5   |
| Risk of bias in individual studies | 12 | Describe methods used for assessing risk of bias of individual studies (including specification of whether this was done at the study or outcome level), and how this information is to be used in any data synthesis. | 5-6 |
| Summary measures                   | 13 | State the principal summary measures (e.g., risk ratio, difference in means).                                                                                                                                          | 6   |
| Synthesis of results               | 14 | Describe the methods of handling data and combining results of studies, if done, including measures of consistency (e.g., $I^2$ ) for each meta-analysis.                                                              | 6   |

Page 1 of 2

| Section/topic               | #  | Checklist item                                                                                                                                   | Reported on page # |
|-----------------------------|----|--------------------------------------------------------------------------------------------------------------------------------------------------|--------------------|
| Risk of bias across studies | 15 | Specify any assessment of risk of bias that may affect the cumulative evidence (e.g., publication bias, selective reporting within studies).     | 6                  |
| Additional analyses         | 16 | Describe methods of additional analyses (e.g., sensitivity or subgroup analyses, meta-regression), if done, indicating which were pre-specified. | 6                  |
| <b>RESULTS</b>              |    |                                                                                                                                                  |                    |

|                               |    |                                                                                                                                                                                                          |      |
|-------------------------------|----|----------------------------------------------------------------------------------------------------------------------------------------------------------------------------------------------------------|------|
| Study selection               | 17 | Give numbers of studies screened, assessed for eligibility, and included in the review, with reasons for exclusions at each stage, ideally with a flow diagram.                                          | 6    |
| Study characteristics         | 18 | For each study, present characteristics for which data were extracted (e.g., study size, PICOS, follow-up period) and provide the citations.                                                             | 7-10 |
| Risk of bias within studies   | 19 | Present data on risk of bias of each study and, if available, any outcome level assessment (see item 12).                                                                                                | 7-10 |
| Results of individual studies | 20 | For all outcomes considered (benefits or harms), present, for each study: (a) simple summary data for each intervention group (b) effect estimates and confidence intervals, ideally with a forest plot. | 7-10 |
| Synthesis of results          | 21 | Present results of each meta-analysis done, including confidence intervals and measures of consistency.                                                                                                  | 7-10 |
| Risk of bias across studies   | 22 | Present results of any assessment of risk of bias across studies (see Item 15).                                                                                                                          | 7-10 |
| Additional analysis           | 23 | Give results of additional analyses, if done (e.g., sensitivity or subgroup analyses, meta-regression [see Item 16]).                                                                                    | 7-10 |
| <b>DISCUSSION</b>             |    |                                                                                                                                                                                                          |      |
| Summary of evidence           | 24 | Summarize the main findings including the strength of evidence for each main outcome; consider their relevance to key groups (e.g., healthcare providers, users, and policy makers).                     | 10   |
| Limitations                   | 25 | Discuss limitations at study and outcome level (e.g., risk of bias), and at review-level (e.g., incomplete retrieval of identified research, reporting bias).                                            | 12   |
| Conclusions                   | 26 | Provide a general interpretation of the results in the context of other evidence, and implications for future research.                                                                                  | 13   |
| <b>FUNDING</b>                |    |                                                                                                                                                                                                          |      |
| Funding                       | 27 | Describe sources of funding for the systematic review and other support (e.g., supply of data); role of funders for the systematic review.                                                               |      |

From: Moher D, Liberati A, Tetzlaff J, Altman DG, The PRISMA Group (2009). Preferred Reporting Items for Systematic Reviews and Meta-Analyses: The PRISMA Statement. PLoS Med 6(6): e1000097. doi:10.1371/journal.pmed1000097
