# Supplementary material for: Association between apolipoprotein C3 Sst I, T-455C, C-482T and C1100T polymorphisms and risk of coronary heart disease
Source: HighWire-hosted journal article supplement (doi:10.1136/bmjopen-2013-004156), 2014-01-01
Supplement: bmjopen-2013-004156supp.pdf [file bmjopen-2013-004156supp.pdf]

**Supplementary Table 1** Characteristics of the included studies

| Study and Publication year     | Country | Study design | Sample size (cases/controls) | Sex (M/F)                          | Mean Age (years)                | Phenotype | Mutation or polymorphisms | Cases |     |    | Controls |     |    | HWE | Method                                  |
|--------------------------------|---------|--------------|------------------------------|------------------------------------|---------------------------------|-----------|---------------------------|-------|-----|----|----------|-----|----|-----|-----------------------------------------|
|                                |         |              |                              |                                    |                                 |           |                           | aa    | ab* | bb | aa       | ab  | bb |     |                                         |
| Yu/2011 <sup>9</sup>           | China   | Case-control | 611(286/325)                 | Cases: 214/72                      | Cases: 56.3                     | CHD       | T-455C                    | 90    | 13  | 47 | 11       | 157 | 54 | Yes | Real-time fluorescence quantitative PCR |
|                                |         |              |                              | Controls: 172/153                  | Controls: 55.79                 |           |                           |       |     | 2  |          |     |    |     |                                         |
|                                |         |              |                              |                                    |                                 |           | C-482T                    | 89    | 13  | 48 | 11       | 159 | 52 | Yes |                                         |
| Sediri/2011 <sup>10</sup>      | Tunisia | Case-control | 687(326/361)                 | Cases: 326/0<br>Controls: 361/0    | Cases: 53.8<br>Controls: 51.1   | MI        | Sst I                     | 26    | 53  | 7  | 31       | 45  | 1  | Yes | PCR-RFLP                                |
| Abd El-Aziz/2011 <sup>12</sup> | Egypt   | Case-control | 300(200/100)                 | Cases: 67/33<br>Controls: 32/18    | Cases: 52.9<br>Controls: 50.7   | MI        | Sst I                     | 15    | 42  | 8  | 70       | 10  | 20 | Yes | PCR-RFLP                                |
| AshokKumar/2010 <sup>15</sup>  | India   | Case-control | 832(416/416)                 | Cases: 322/94<br>Controls: 315/101 | Cases: 53.23<br>Controls: 53.59 | CHD       | Sst I                     | 18    | 19  | 34 | 21       | 176 | 22 | Yes | PCR-RFLP                                |

|                                  |         |               |               |                                     |                                 |            |         |         |         |         |         |     |    |     |                                          |
|----------------------------------|---------|---------------|---------------|-------------------------------------|---------------------------------|------------|---------|---------|---------|---------|---------|-----|----|-----|------------------------------------------|
| Bhanushali/2010 <sup>11</sup>    | India   | Case-control  | 240(50/190)   | Cases: 82/8<br>Controls: 146/44     | Cases: 47<br>Controls: 48       | CHD        | Sst I   | -       | -       | -       | -       | -   | -  | Yes | PCR-RFLP                                 |
| Muendlein/2008 <sup>16</sup>     | Austria | Cross-section | 557(332/225)  | Cases: 264/68<br>Controls: 123/102  | Cases: 62.5<br>Controls: 61.5   | CHD        | C-482T  | 16<br>2 | 14<br>3 | 27      | 11<br>7 | 87  | 21 | Yes | Real-time fluorescence quantitative PCR  |
| Martinelli/2007 <sup>17</sup>    | Italy   | Case-control  | 913(669/244)  | Cases: 544/125<br>Controls: 168/76  | Cases: 60.7<br>Controls: 58.7   | CHD        | T-455C  | 24<br>4 | 30<br>0 | 12<br>5 | 97      | 118 | 29 | Yes | Immobilized oligonucleotide probes array |
| Dallongeville/2006 <sup>18</sup> | France  | Case-control  | 917(442/475)  | Cases: 442/0<br>Controls: 475/0     | Cases: 35-64<br>Controls: 35-64 | CHD and MI | C-482T  | 23<br>7 | 15<br>5 | 35      | 25<br>5 | 185 | 31 | Yes | PCR-RFLP                                 |
| Tobin/2004 <sup>19</sup>         | UK      | Case-control  | 1054(549/505) | Cases: 372/177<br>Controls: 313/192 | Cases: 61.9<br>Controls: 58.6   | MI         | C-482T  | 29<br>1 | 23<br>3 | 23      | 28<br>3 | 193 | 29 | Yes | Immobilized oligonucleotide probes array |
|                                  |         |               |               |                                     |                                 |            | T-455C  | 21<br>1 | 28<br>4 | 52      | 21<br>4 | 229 | 62 | Yes |                                          |
|                                  |         |               |               |                                     |                                 |            | C1100 T | 29<br>8 | 20<br>9 | 40      | 29<br>6 | 172 | 37 | Yes |                                          |

|                             |        |                     |                |                                    |                                   |     |                       |         |         |         |         |     |    |     |                                          |
|-----------------------------|--------|---------------------|----------------|------------------------------------|-----------------------------------|-----|-----------------------|---------|---------|---------|---------|-----|----|-----|------------------------------------------|
| Liu/2004 <sup>20</sup>      | USA    | Nested case-control | 758(385/373)   | Cases: 385/0<br>Controls: 373/0    | Cases: 60<br>Controls: 59         | MI  | Sst I                 | 29<br>5 | 77      | 6       | 29<br>7 | 60  | 4  | Yes | PCR-RFLP                                 |
| Chhabra/2004 <sup>21</sup>  | India  | Case-control        | 309(158/151)   | Cases: 139/19<br>Controls: 139/12  | Cases: 53.25<br>Controls: 52.45   | CHD | Sst I                 | 66      | 76      | 16      | 71      | 66  | 14 | Yes | PCR-RFLP                                 |
| Wong/2003 <sup>22</sup>     | UK     | Cohort              | 2808(187/2621) | Cases: 187/0<br>Controls: 2621/0   | Cases: 56.67<br>Controls: 56.01   | CHD | C1100T, C-428T, Sst I | -       | -       | -       | -       | -   | -  | -   | PCR-RFLP                                 |
| Izar/2003 <sup>23</sup>     | Brazil | Case-control        | 224(112/112)   | Cases: 65/47<br>Controls: 66/46    | Cases: 46<br>Controls: 45(Median) | CHD | Sst I                 | 81      | 23      | 3       | 71      | 32  | 1  | Yes | PCR-RFLP                                 |
| Olivieri/2002 <sup>24</sup> | Italy  | Cross-section       | 800(549/251)   | Cases: 449/100<br>Controls: 168/83 | Cases: 60.4<br>Controls: 57.6     | CHD | T-455C                | 19<br>4 | 25<br>3 | 10<br>2 | 11<br>0 | 118 | 23 | Yes | Immobilized oligonucleotide probes array |
|                             |        |                     |                |                                    |                                   |     | C1100T                | 29<br>8 | 20<br>5 | 46<br>0 | 12<br>6 | 108 | 17 | Yes |                                          |
|                             |        |                     |                |                                    |                                   |     | Sst I                 | 45<br>2 | 97      | 0       | 21<br>4 | 37  | 0  | Yes |                                          |

|                              |         |              |                |                                      |                               |     |       |     |     |   |     |     |   |     |          |
|------------------------------|---------|--------------|----------------|--------------------------------------|-------------------------------|-----|-------|-----|-----|---|-----|-----|---|-----|----------|
| Russo/2001 <sup>25</sup>     | USA     | Cohort       | 2485(202/2283) | Cases: 146/56<br>Controls: 1133/1150 | -                             | CHD | Sst I | -   | -   | - | -   | -   | - | Yes | PCR-RFLP |
| Kee/1999 <sup>30</sup>       | UK      | Case-control | 1375(761/614)  | Cases: 761/0<br>Controls: 614/0      | -                             | MI  | Sst I | 501 | 112 | 1 | 645 | 113 | 3 | Yes | PCR-RFLP |
| Wick/1995 <sup>26</sup>      | Germany | Case-control | 313(212/101)   | -                                    | -                             | CHD | Sst I | 170 | 42  | 0 | 85  | 16  | 0 | Yes | PCR-RFLP |
| Vavatsi/1995 <sup>27</sup>   | Greece  | Case-control | 149(95/54)     | Cases: 85/10<br>Controls: 46/9       | Cases: 51<br>Controls: 50     | CHD | Sst I | 69  | 20  | 0 | 36  | 12  | 2 | Yes | PCR-RFLP |
| Rigoli/1995 <sup>28</sup>    | Italy   | Case-control | 124(62/62)     | Cases: 43/19<br>Controls: 42/20      | Cases: 58.2<br>Controls: 57.6 | CHD | Sst I | 41  | 21  | 0 | 52  | 10  | 0 | Yes | PCR-RFLP |
| Miettinen/1994 <sup>29</sup> | Finland | Case-control | 132(82/50)     | Cases: 78/4<br>Controls: 42/8        | Cases: 40.8<br>Controls: 38.7 | CHD | Sst I | 62  | 19  | 1 | 37  | 12  | 1 | Yes | PCR-RFLP |

MI: myocardial infarction; AMI: acute myocardial infarction; CHD: coronary heart disease; HWE: Hardy-Weinberg Equilibrium; PCR: polymerase chain reaction; RFLP: restriction fragment length polymorphism

-: not reported.



### **For case-control and cross-sectional studies**

Q1: Is the case definition adequate?

- a) yes, with independent validation  b) yes, eg record linkage or based on self-reports  c) no description

Q2: Representativeness of the cases

- a) consecutive or obviously representative series of cases  b) potential for selection biases or not stated

Q3: Selection of Controls

- a) community controls  b) hospital controls  c) no description

Q4: Definition of Controls

- a) no history of disease (endpoint)  b) no description of source

Q5: Comparability of cases and controls on the basis of the design or analysis

- a) study controls for age  b) study controls for any additional factor

Q6: Ascertainment of exposure

- a) secure record  b) structured interview where blind to case/control status   
c) interview not blinded to case/control status  d) written self-report or medical record only   
e) no description

Q7: Same method of ascertainment for cases and controls

- a) yes  b) no

Q8: Non-Response rate

- a) same rate for both groups  b) non respondents described  c) rate different and no designation

### **For cohort studies**

Q1: Representativeness of the exposed cohort

- a) truly representative of the average population in the community  b) somewhat representative of the average population in the community   
c) selected group of users  d) no description of the derivation of the cohort

Q2: Selection of the non exposed cohort

- a) drawn from the same community as the exposed cohort  b) drawn from a different source

c) no description of the derivation of the non-exposed cohort

Q3: Ascertainment of exposure

a) secure record  b) structured interview

c) written self-report d) no description

Q4: Demonstration that outcome of interest was not present at start of study

a) yes  b) no

Q5: Comparability of cohorts on the basis of the design or analysis

a) study controls for age b) study controls for any additional factor Outcome

Q6: Assessment of outcome

a) independent blind assessment  b) record linkage

c) self-report d) no description

Q7: Was follow-up long enough for outcomes to occur

a) yes  b) no

Q8: Adequacy of follow up of cohorts

a) complete follow up - all subjects accounted for

b) subjects lost to follow up unlikely to introduce bias - small number lost > 70 % follow up, or description provided of those lost

c) follow up rate < 70% and no description of those lost

d) no statement

### Supplementary Table 3 Studies with multivariable OR

| Study                         | Polymorphism | Univariate OR (95% CI) | Multivariable OR (95% CI) | Adjusted factors                               |
|-------------------------------|--------------|------------------------|---------------------------|------------------------------------------------|
| Sediri/2011 <sup>10</sup>     | Sst I        | 1.54 (1.02-2.34)       | 2.02 (1.11-3.67)          | age, diabetes, dyslipidemia, BMI and smoking   |
| Muendlein/2008 <sup>16</sup>  | C-482T       | 1.14 (0.81-1.60)       | 1.18 (0.8-1.75)           | age, sex, T2DM, BMI, hypertension, and smoking |
| Martinelli/2007 <sup>17</sup> | T-455C       | 1.15 (0.85-1.55)       | 1.82 (1.05-3.18)          | age, sex, smoke, hypertension, diabetes, BMI,  |

|                                  |        |                  |                  |                                                                                                                                                                              |
|----------------------------------|--------|------------------|------------------|------------------------------------------------------------------------------------------------------------------------------------------------------------------------------|
|                                  |        |                  |                  | creatinine, LDL-cholesterol, HDL-cholesterol, TG, ApoC-III and hs-CRP                                                                                                        |
| Dallongeville/2006 <sup>18</sup> | C-482T | 0.95 (0.73-1.23) | 0.91 (0.69-1.22) | age                                                                                                                                                                          |
| Liu/2004 <sup>20</sup>           | Sst I  | 1.13 (0.80-1.61) | 1.25 (0.74–2.10) | age, cigarette smoking, BMI, alcohol intake, physical activity, history of diabetes mellitus, history of high cholesterol, history of hypertension, and use of multivitamins |
| Wong/2003 <sup>22</sup>          | Sst I  | 0.72 (0.45-1.15) | 0.70 (0.44-1.12) | age and practice and triglyceride levels                                                                                                                                     |
| Olivieri/2002 <sup>24</sup>      | Sst I  | 1.24 (0.82-1.87) | 0.97 (0.59–1.59) | age, gender, smoking status, presence of diabetes and hypertension, cholesterol, triglycerides, apoA-I, and apoB.                                                            |

---

BMI: body mass index; T2DM: type 2 diabetes mellitus; LDL: low density lipoprotein; HDL: high density lipoprotein; TG: triglyceride; hs-CRP: high sensitivity C-reaction protein.
